# Supplementary material for: Polycyclic aromatic hydrocarbons in dust from rural communities around gas flaring points in the Niger Delta of Nigeria: an exploration of spatial patterns, sources and possible risk
Source: Royal Society of Chemistry journal article supplement (doi:10.1039/d3em00048f), 2023-05-16
Supplement: d3em00048f1.pdf [file d3em00048f1.pdf]

# **Polycyclic aromatic hydrocarbons in dust from rural communities around gas flaring points in the Niger Delta of Nigeria: an exploration of spatial patterns, sources and possible risk**

Eze W. **Odali**<sup>1</sup>, Chukwujindu, M.A. **Iwegbue**<sup>1\*</sup>, Francis E. **Egobueze**<sup>2</sup>, Godwin E. **Nwajei**<sup>1</sup>  
and Bice S. **Martincigh**<sup>3</sup>

<sup>1</sup>Department of Chemistry, Delta State University, P.M.B. 1, Abraka, Nigeria

<sup>2</sup>Nigerian Agip Oil Company, Rumueme, Port Harcourt, Nigeria

<sup>3</sup>School of Chemistry and Physics, University of KwaZulu-Natal, Westville Campus, Private Bag X54001, Durban 4000, South Africa

## **Supplementary Materials**

### ***S1: Ecological risk assessment***

Equations (1) to (9) were utilised for this purpose. The risk quotient ( $RQ_j$ ) value for individual PAHs in dust from these communities is given by the expression:

$$RQ_j = \frac{C_{PAHs}}{C_{QV}} \quad (1)$$

where  $C_{PAHs}$  is the concentration of PAHs in the dust, and  $C_{QV}$  represents the quality value for the individual PAH in the dust. In this study, we adopted the NC and MPC values of PAHs in soil for the purpose of evaluating the ecological risk relating to exposure to dust. Thus, Equations (2) and (3) were used to evaluate  $RQ_{(NCs)}$  and  $RQ_{(MPCs)}$  respectively.

$$RQ_{(NCs)} = \frac{C_{PAHs}}{C_{QV(NCs)}} \quad (2)$$

$$RQ_{(MPCs)} = \frac{C_{PAHs}}{C_{QV(MPCs)}} \quad (3)$$

For the ecological risk assessment, we utilized the NC and MPC values given by Verbuggen (2012) (Supplementary Material Table S1). The  $RQ_{\Sigma PAHs}$  is an expression for the total risk quotient associated with the NCs and MPCs of the PAHs; thus,  $RQ_{\Sigma PAHs(NCs)}$  and  $RQ_{\Sigma PAHs(MPCs)}$  are obtained by utilizing Equations (4) to (6).

$$RQ_{\Sigma PAHs} = \frac{C_{\Sigma PAHs}}{C_{QV(\Sigma PAHs)}} \quad (4)$$

$$RQ_{\Sigma PAHs(NCs)} = \frac{C_{\Sigma PAHs}}{\sum C_{QV(NCs)}} \quad (5)$$

$$RQ_{\Sigma PAHs(MPCs)} = \frac{C_{\Sigma PAHs}}{\sum C_{QV(MPCs)}} \quad (6)$$

These total risks were obtained as the sums of only the RQ values  $\geq 1$ .

$$RQ_{\Sigma PAHs} = \sum_{i=1}^{16} RQ_j \quad RQ_j \geq 1 \quad (7)$$

$$RQ_{\Sigma PAHs(NCs)} = \sum_{i=1}^{16} RQ_{j(NCs)} \quad RQ_{j(NCs)} \geq 1 \quad (8)$$

$$RQ_{\Sigma PAHs(MPCs)} = \sum_{i=1}^{16} RQ_{j(MPCs)} \quad RQ_{j(MPCs)} \geq 1 \quad (9)$$

### ***S2: Human health risk assessment***

The concentrations of Nap, Acy, Ace, Flu, Ant, Flt and Pyr were utilised for estimating the chronic daily intakes (CDIs) of PAHs from these exposure routes, while those of Nap, Chry, BaA, BbF, BkF, BaP, DahA, and IndP were utilised for estimating the carcinogenic risk. The chronic daily intake (CDI) values for the different routes were obtained by applying Equations (10) to (12).

$$CDI_{ing-nc} = \frac{C \times IngR \times EF \times ED \times CF}{BW \times AT_{nc}} \quad (10)$$

$$CDI_{inh-nc} = \frac{C \times InhR \times EF \times ET \times ED}{PEF \times 24 \times AT_{nc}} \quad (11)$$

$$CDI_{dermal-nc} = \frac{C \times SA \times AF \times ABS_d \times EF \times ED \times CF}{BW \times AT_{nc}} \quad (12)$$

$$HQ = \frac{CDI_{nc}}{RfD} \quad (13)$$

$$\text{Hazard index (HI)} = \sum HQ = HQ_{ing} + HQ_{inh} + HQ_{dermal} \quad (14)$$

The cancer risk values for human exposure to PAHs from the three exposure routes were estimated by applying Equations (15)-(17).

$$Risk_{ing} = \frac{C \times IngR \times EF \times ED \times CF \times SFO}{BW \times AT_{ca}} \quad (15)$$

$$Risk_{inh} = \frac{C \times InhR \times EF \times ED \times IUR}{PEF \times AT_{ca}} \quad (16)$$

$$Risk_{dermal} = \frac{C \times SA \times AF \times ABS_d \times EF \times ED \times CF \times SFO \times GIABS}{BW \times AT_{ca}} \quad (17)$$

$$ILCR = \Sigma Risk = Risk_{ing} + Risk_{inh} + Risk_{dermal} \quad (18)$$

where  $CDI_{ing}$ ,  $CDI_{inh}$  and  $CDI_{dermal}$  are the respective  $CDI$  associated with ingestion, inhalation and dermal contact, while  $Risk_{ing}$ ,  $Risk_{inh}$  and  $Risk_{dermal}$  are the respective cancer risk associated with ingestion, inhalation and dermal contact;  $ABS_d$  depicts the dermal absorption factor;  $GIABS$  depicts the gastrointestinal absorption factor;  $AF$  ( $\text{mg cm}^{-2}$ ) is the adherence factor for soil to skin;  $ED$ ,  $EF$  and  $ET$  depict the exposure duration, frequency and time ( $\text{h d}^{-1}$ ) respectively;  $IngR$  ( $\text{mg d}^{-1}$ ) is the ingestion rate;  $InhR$  ( $\text{m}^3 \text{d}^{-1}$ ) is the inhalation rate;  $PEF$  ( $\text{m}^3 \text{kg}^{-1}$ ) refers to the particle emission factor for soil/dust-to-air;  $IUR$  is the inhalation unit risk;  $RfD$  and  $SFO$  are the oral reference dose and slope factor ( $\text{mg kg}^{-1} \text{d}^{-1}$ ) respectively;  $SA$  ( $\text{cm}^2 \text{event}^{-1}$ ) depicts the surface area of the skin in contact with dust;  $CF$  ( $10^{-6}$ ) is the unit conversion factor;  $BW$  depicts the mass of the human body ( $\text{kg}$ ); and  $AT_{nc}$  and  $AT_c$  depict the

averaging times for non-carcinogenic and carcinogenic effects respectively. Tables S3 and S4 provide the information on the toxicological variables applied in the human health assessment.

**Table S1:** Values of  $C_{QV(NC_s)}$  and  $C_{QV(MPC_s)}$  (in  $\mu\text{g kg}^{-1}$ ) for individual PAHs (Verbruggen, 2012)

| PAH Compound | $C_{QV(NC_s)}$ | $C_{QV(MPC_s)}$ |
|--------------|----------------|-----------------|
| Nap          | 6.9            | 690             |
| Acy          | 1.7            | 170             |
| Ace          | 6.8            | 680             |
| Flu          | 16             | 1600            |
| Phen         | 36             | 3600            |
| Ant          | 3.4            | 340             |
| Flt          | 48             | 4800            |
| Pyr          | 18             | 1800            |
| BaA          | 1.9            | 190             |
| Chry         | 16             | 1600            |
| BbF          | 7.9            | 790             |
| BkF          | 7.9            | 790             |
| BaP          | 1.6            | 160             |
| IndP         | 3.8            | 380             |
| DahA         | 1.8            | 180             |
| BghiP        | 4.9            | 490             |

**Table S2:** Risk classification of individual PAHs and  $\Sigma$ PAHs (Kalf *et al.*, 1997)

| Individual PAHs | $RQ_{(NC_s)}$ |                | $RQ_{(MPC_s)}$ |               | $\Sigma$ PAHs              | $RQ_{\Sigma PAHs(NC_s)}$ |                           | $RQ_{\Sigma PAHs(MPC_s)}$ |                          |
|-----------------|---------------|----------------|----------------|---------------|----------------------------|--------------------------|---------------------------|---------------------------|--------------------------|
|                 | $RQ_{(NC_s)}$ | $RQ_{(MPC_s)}$ | $RQ_{(MPC_s)}$ | $RQ_{(NC_s)}$ |                            | $RQ_{\Sigma PAHs(NC_s)}$ | $RQ_{\Sigma PAHs(MPC_s)}$ | $RQ_{\Sigma PAHs(MPC_s)}$ | $RQ_{\Sigma PAHs(NC_s)}$ |
| Risk-free       | 0             |                |                |               | Risk-free                  | = 0                      |                           |                           |                          |
|                 |               |                |                |               | Low-risk                   | $\geq 1; < 800$          | = 0                       |                           |                          |
| Moderate-risk   | $\geq 1$      | $< 1$          |                |               | Moderate risk <sub>1</sub> | $\geq 800$               | = 0                       |                           |                          |
|                 |               |                |                |               | Moderate risk <sub>2</sub> | $< 800$                  | $\geq 1$                  |                           |                          |
| High-risk       |               |                | $\geq 1$       |               | High-risk                  | $\geq 800$               | $\geq 1$                  |                           |                          |

**Table S3:** Toxicological parameters of the investigated PAHs used for health risk assessment

| PAHs      | BaP <sub>TEF</sub> | BaP <sub>MEF</sub> | Oral Ingestion Reference Dose (RfD <sub>ing</sub> ) | Inhalation Reference Dose (RfD <sub>inh</sub> ) | SFO <sub>ing</sub> (mg kg <sup>-1</sup> d <sup>-1</sup> ) | IUR (µg m <sup>-3</sup> ) | GIABS        |
|-----------|--------------------|--------------------|-----------------------------------------------------|-------------------------------------------------|-----------------------------------------------------------|---------------------------|--------------|
| Nap       |                    |                    | 2 × 10 <sup>-2</sup>                                | 8.57 × 10 <sup>-4</sup>                         | 1.2 × 10 <sup>-1*</sup>                                   | 3.4 × 10 <sup>-5*</sup>   | 1            |
| Acy       |                    |                    | 6 × 10 <sup>-2</sup>                                | 6 × 10 <sup>-2</sup>                            |                                                           |                           |              |
| Ace       |                    |                    | 6 × 10 <sup>-2</sup>                                | 6 × 10 <sup>-2</sup>                            |                                                           |                           |              |
| Flu       |                    |                    | 4 × 10 <sup>-2</sup>                                | 4 × 10 <sup>-2</sup>                            |                                                           |                           |              |
| Phen      |                    |                    | 3 × 10 <sup>-2</sup>                                | 3 × 10 <sup>-2</sup>                            |                                                           |                           |              |
| Ant       |                    |                    | 3 × 10 <sup>-1</sup>                                | 3 × 10 <sup>-1</sup>                            |                                                           |                           |              |
| Flt       |                    |                    | 4 × 10 <sup>-2</sup>                                | 4 × 10 <sup>-2</sup>                            |                                                           |                           |              |
| Pyr       |                    |                    | 3 × 10 <sup>-1</sup>                                | 3 × 10 <sup>-1</sup>                            |                                                           |                           |              |
| BaA       | 0.1                | 0.082              |                                                     |                                                 | 7.3 × 10 <sup>-1</sup>                                    | 1.1 × 10 <sup>-4</sup>    | 1            |
| Chry      | 0.001              | 0.017              |                                                     |                                                 | 7.3 × 10 <sup>-3</sup>                                    | 1.1 × 10 <sup>-5</sup>    | 1            |
| BbF       | 0.1                | 0.25               |                                                     |                                                 | 7.3 × 10 <sup>-1</sup>                                    | 1.1 × 10 <sup>-4</sup>    | 1            |
| BkF       | 0.01               | 0.11               |                                                     |                                                 | 7.3 × 10 <sup>-2</sup>                                    | 1.1 × 10 <sup>-4</sup>    | 1            |
| BaP       | 1                  | 1                  |                                                     |                                                 | 7.3                                                       | 1.1 × 10 <sup>-3</sup>    | 1            |
| IndP      | 0.1                | 0.31               |                                                     |                                                 | 7.3 × 10 <sup>-1</sup>                                    | 1.1 × 10 <sup>-4</sup>    | 1            |
| DahA      | 1                  | 0.29               |                                                     |                                                 | 7.3                                                       | 1.2 × 10 <sup>-3</sup>    | 1            |
| Reference | USEPA (1993)       | Durant (1996)      | USEPA (2012)                                        | USEPA (2012)                                    | USDOE (2011)                                              | USEPA (2010)              | USEPA (2011) |

\*California Office of Environmental Health Hazard and Assessment (OEHHA) (<https://oehha.ca.gov/chemicals>)

**Table S4:** Values of variables for estimation of human health risk

| Parameters       | Unit                                | Definition                                  | Values                 |       | References   |
|------------------|-------------------------------------|---------------------------------------------|------------------------|-------|--------------|
|                  |                                     |                                             | Child                  | Adult |              |
| C                | µg kg <sup>-1</sup>                 | Concentrations of PAHs in the matrices      |                        |       |              |
| ABS              | -                                   | Dermal absorption factor for PAHs           | 0.13                   | 0.13  | USEPA (2011) |
| AF               | Mg cm <sup>-2</sup>                 | Soil/dust to skin adherence factor          | 0.2                    | 0.07  | USEPA (2011) |
| BW               | kg                                  | Average body weight                         | 15                     | 80    | USEPA (2014) |
| ED               | year                                | Exposure duration                           | 6                      | 20    | USEPA (2014) |
| EF               | d yr <sup>-1</sup>                  | Exposure frequency                          | 350                    | 350   | USEPA (2001) |
| ET               | h d <sup>-1</sup>                   | Exposure time                               | 24                     | 24    | USEPA (1989) |
| IngR             | mg d <sup>-1</sup>                  | Dust ingestion rate for receptor            | 200                    | 100   | USDOE (2011) |
| InhR             | m <sup>3</sup> d <sup>-1</sup>      | Inhalation rate                             | 30                     | 60    | USDOE (2011) |
| SA               | cm <sup>2</sup> event <sup>-1</sup> | Skin surface area                           | 2800                   | 5700  | USDOE (2011) |
| AT <sub>nc</sub> | d                                   | Averaging time for non-carcinogenic effects | ED × 365               |       | USDOE (2011) |
| AT <sub>ca</sub> | d                                   | Averaging time for carcinogenic effects     | LT × 365               |       | USDOE (2011) |
| LT               | year                                | Lifetime                                    | 55 years               |       | WHO (2018)   |
| PEF              | m <sup>3</sup> kg <sup>-1</sup>     | Dust to air particulate emission factor     | 1.36 × 10 <sup>9</sup> |       | USDOE (2011) |



**Table S5: PAH concentrations ( $\mu\text{g kg}^{-1}$ ) in indoor and outdoor dusts from rural communities around gas flare points**

|              |         | Nap  | Ace   | Acy   | Flu   | Phen  | Ant   | Flt  | Pyr  | BaA   | Chry | BbF  | BkF   | BaP   | DahA  | IndP   | BghiP | Total         | 2R            | 3R     | 4R    | 5R    | 6R     |       |
|--------------|---------|------|-------|-------|-------|-------|-------|------|------|-------|------|------|-------|-------|-------|--------|-------|---------------|---------------|--------|-------|-------|--------|-------|
| Emu-Ebendo   | IN-D1   | 30.0 | 62.0  | 42.0  | 12.0  | 1260  | 3520  | 50   | 6    | 46    | 48   | 178  | 436   | 1010  | 1100  | 382    | 1620  | <b>9810</b>   | 30.0          | 4900   | 150   | 2730  | 2000   |       |
|              | IN-D2   | 462  | 248   | 46.0  | 6.00  | 9760  | 3540  | 358  | 408  | 204   | 554  | 426  | 1390  | 2080  | 2520  | 1280   | 794   | <b>24100</b>  | 462           | 13600  | 1520  | 6420  | 2070   |       |
|              | IN-D3   | 2040 | 12800 | 28700 | 43600 | 15200 | 19400 | 8880 | 3380 | 2410  | 604  | 1520 | 1570  | 3560  | 1180  | 1970   | 1610  | <b>148000</b> | 2040          | 120000 | 15300 | 7830  | 3580   |       |
|              | IN-D4   | 16.0 | 6.00  | 200   | 148   | 664   | 260   | 120  | 132  | 44.0  | 106  | 90   | 212   | 562   | 260   | 210    | 326   | <b>3360</b>   | 16.0          | 1280   | 402   | 1120  | 536    |       |
|              | IN-D5   | 2.00 | 0.16  | 0.26  | 1.42  | 1.24  | 0.36  | 1.82 | 0.24 | 5.60  | 14.0 | 16.0 | 156   | 266   | 656   | 164    | 60    | <b>1340</b>   | 2.00          | 3.44   | 21.7  | 1090  | 224    |       |
|              | IN-D6   | <LOQ | <LOQ  | <LOQ  | <LOQ  | <LOQ  | <LOQ  | <LOQ | 10.0 | 52.0  | 14.0 | 4160 | 26600 | 41400 | 554   | 83400  | 8640  | 1900          | <b>167000</b> | <LOQ   | <LOQ  | 4240  | 152000 | 10500 |
|              | IN-D7   | <LOQ | <LOQ  | <LOQ  | <LOQ  | <LOQ  | 14.0  | 10.0 | 80.0 | 8.00  | 500  | <LOQ | <LOQ  | 6300  | 65500 | 14600  | 3140  | <b>90100</b>  | <LOQ          | 14.0   | 598   | 71800 | 17700  |       |
|              | IN-D8   | <LOQ | 8.00  | 14.00 | 4.00  | 6.00  | 8.00  | 8.00 | 4.00 | 12.0  | 54.0 | <LOQ | <LOQ  | <LOQ  | <LOQ  | 10300  | 5280  | <b>15700</b>  | <LOQ          | 40.0   | 78.0  | <LOQ  | 15600  |       |
|              | IN-D9   | 0.24 | 0.56  | 1.12  | 0.50  | 1.70  | 8.92  | 0.24 | 0.44 | 0.74  | 32.0 | 46.0 | 26.0  | 214   | 276   | 100    | 68    | <b>776</b>    | 0.24          | 12.8   | 33.4  | 562   | 168    |       |
|              | IN-D10  | 0.36 | 1.22  | 1.18  | 0.36  | 0.78  | 2.74  | 0.30 | 1.76 | 0.62  | 9.82 | 20.8 | 37.8  | 110   | 146   | 102    | 122   | <b>558</b>    | 0.36          | 6.28   | 12.5  | 315   | 224    |       |
| Otu-Jeremi   | IN-D1   | <LOQ | 2.64  | 0.40  | 20.7  | 12.1  | 3.48  | 9.10 | <LOQ | <LOQ  | <LOQ | <LOQ | <LOQ  | <LOQ  | <LOQ  | 405000 | 8200  | <b>413000</b> | <LOQ          | 39.3   | 9.1   | <LOQ  | 413000 |       |
|              | IN-D2   | 0.74 | 3.34  | 4.90  | 5.4   | 0.30  | 4.16  | 6.80 | 5.36 | 29    | 192  | 382  | 4410  | <LOQ  | <LOQ  | <LOQ   | 45900 | <b>50900</b>  | 0.74          | 18.1   | 233   | 4790  | 45900  |       |
|              | IN-D3   | 12.4 | 123   | 8.30  | 37.6  | 11.6  | 1.26  | 4.24 | 9.58 | 1.8   | <LOQ | <LOQ | 5400  | <LOQ  | <LOQ  | <LOQ   | 52100 | <b>57700</b>  | 12.4          | 182    | 15.6  | 5400  | 52100  |       |
|              | IN-D4   | 43.7 | 34.7  | 11.2  | 7.34  | 6.66  | 3.62  | 1.96 | 1.52 | 2.64  | 15.4 | 1530 | <LOQ  | <LOQ  | 35800 | 4780   | 4210  | <b>46400</b>  | 43.7          | 63.5   | 21.5  | 37300 | 8980   |       |
|              | IN-D5   | 1.98 | 17.7  | 3.74  | 2.9   | 5.5   | 2.82  | 3.08 | 2.04 | 1.02  | <LOQ | <LOQ | <LOQ  | <LOQ  | 6260  | 279    | 6580  | <b>6580</b>   | 1.98          | 32.7   | 6.14  | <LOQ  | 6540   |       |
|              | IN-D6   | 1.70 | 8.88  | 1.12  | 1.96  | 9.48  | 1.62  | 3.66 | 5.76 | <LOQ  | 28.2 | 2560 | <LOQ  | <LOQ  | 24700 | 9150   | 647   | <b>37100</b>  | 1.70          | 23.1   | 37.6  | 27200 | 9800   |       |
|              | IN-D7   | 3.54 | 30.6  | 3.26  | 1.24  | 5.74  | 0.94  | 5.16 | 5.28 | 2.86  | 1.84 | 1700 | <LOQ  | <LOQ  | 20200 | 17500  | 1670  | <b>41000</b>  | 3.54          | 41.8   | 15.1  | 21900 | 19200  |       |
|              | IN-D8   | 5.64 | 19.9  | 5.14  | 3.26  | 8.10  | 4.06  | 1.32 | 3.46 | 1.3   | <LOQ | 1480 | <LOQ  | <LOQ  | 25800 | 2550   | 4380  | <b>34300</b>  | 5.64          | 40.5   | 6.08  | 27300 | 6930   |       |
|              | IN-D9   | 8.58 | 12.5  | 10.2  | 0.84  | 16.0  | 7.70  | 0.36 | 2.06 | 194   | <LOQ | 356  | 2490  | 14400 | 10700 | 2150   | 16900 | <b>47000</b>  | <LOQ          | 47.2   | 196   | 27900 | 19000  |       |
|              | IN-D10  | 6.88 | 13.6  | 3.52  | 1.78  | 2.18  | 2.08  | 2.38 | 3.5  | 18.2  | <LOQ | 747  | 4060  | <LOQ  | 23200 | 9660   | 8880  | <b>46600</b>  | 6.88          | 23.2   | 24.1  | 28000 | 18500  |       |
| Ebedei       | IN-D1   | 1.08 | 2.26  | 5.86  | 14.3  | 0.56  | 70.5  | 159  | 951  | 2420  | 2860 | 1550 | 4400  | 9670  | 1420  | 4130   | 4080  | <b>31700</b>  | 1.10          | 93.4   | 6390  | 17000 | 8210   |       |
|              | IN-D2   | 0.28 | 8.32  | 0.54  | 4.32  | 21.8  | 27.8  | 62.3 | 909  | 1680  | 2640 | 1270 | 5130  | 10300 | 10700 | 805    | 4020  | <b>37500</b>  | 0.30          | 62.8   | 5280  | 27400 | 4820   |       |
|              | IN-D3   | 190  | 1490  | 1030  | 1650  | 2160  | 2450  | 577  | 1000 | 405   | 3.76 | 20   | 43.8  | 623   | 399   | 0.58   | 375   | <b>12400</b>  | 189           | 8770   | 1990  | 1090  | 375    |       |
|              | IN-D4   | 57.0 | 3380  | 1050  | 1060  | 1120  | 2330  | 261  | 1610 | 821   | 5.74 | 10   | 20.1  | 515   | 257   | 34.7   | 427   | <b>13000</b>  | 57.0          | 8940   | 2690  | 803   | 461    |       |
|              | IN-D5   | 2.00 | 1.02  | 1.96  | 5.08  | 1.04  | 2.26  | 1.2  | 3.08 | 5.2   | 5.8  | 35.3 | 101   | 1700  | 520   | 395    | 1150  | <b>3930</b>   | 2.000         | 11.4   | 15.3  | 2360  | 1550   |       |
|              | IN-D6   | <LOQ | 2.60  | 710   | 1090  | 1330  | 1520  | 327  | 54.1 | 135   | 1.98 | 4.62 | 19.3  | 719   | 137   | 231    | 137   | <b>6420</b>   | <LOQ          | 4660   | 518   | 879   | 368    |       |
|              | IN-D7   | 0.52 | 1.48  | 0.82  | 1.3   | 1.62  | 1.14  | 1.32 | 1.18 | 2.42  | 5.74 | 66.9 | 821   | 769   | 412   | 145    | 117   | <b>2350</b>   | 0.50          | 6.40   | 10.7  | 2070  | 262    |       |
|              | IN-D8   | 1.56 | 17.2  | 1.1   | 2.96  | 1.74  | 23.3  | 1.78 | 0.68 | 2.26  | 12.3 | 59.8 | 32.6  | 1750  | 266   | 137    | 264   | <b>2580</b>   | 1.60          | 46.3   | 17.1  | 2110  | 401    |       |
|              | IN-D9   | 0.28 | 1.66  | 4.34  | 84.0  | 0.60  | 0.80  | 1.12 | 3.88 | 6.00  | 17.9 | 11.4 | 369   | 862   | 1060  | 284    | 162   | <b>2870</b>   | 0.30          | 91.4   | 28.9  | 2300  | 446    |       |
|              | IN-D10  | 3.18 | 1.74  | 3.52  | 10.7  | 46.1  | 81.4  | 516  | 1710 | 1900  | 1732 | 3020 | 2100  | 3160  | 4040  | 2890   | 544   | <b>21800</b>  | 3.20          | 144    | 5850  | 12300 | 3440   |       |
| Ugono-Abraka | IN-D1   | 54.0 | 44.0  | 48.0  | 56.0  | 76.0  | 66.0  | 120  | 98.0 | 760   | 76.0 | 256  | 96.0  | 680   | 114   | 104    | 64    | <b>2710</b>   | 540           | 290    | 1050  | 1150  | 168    |       |
|              | IN-D2   | 484  | 94.0  | 174   | 198   | 94.0  | 98.0  | 172  | 102  | 140   | 306  | 352  | 408   | 860   | 318   | 980    | 476   | <b>5260</b>   | 484           | 658    | 720   | 1940  | 1460   |       |
|              | IN-D3   | 58.0 | 34.0  | 22.0  | 22.0  | 14.0  | 18.0  | 22.0 | 30.0 | 24.0  | 24.0 | 18.0 | 76.0  | 32.0  | 42    | 54     | 54    | <b>544</b>    | 58            | 110    | 100   | 168   | 108    |       |
|              | IN-D4   | 264  | 188   | 232   | 264   | 280   | 132   | 628  | 228  | 466   | 306  | 234  | 1690  | 1160  | 1070  | 984    | 1180  | <b>9320</b>   | 264           | 1100   | 1630  | 4160  | 2160   |       |
|              | IN-D5   | 8.00 | 8.00  | 8.00  | 4.00  | 18.00 | 4.00  | 6.00 | 10.0 | 36.0  | 242  | 20.0 | 32.0  | 6.00  | 10.0  | 22.0   | 10.0  | <b>444</b>    | 8.00          | 42.0   | 294   | 68.0  | 32.0   |       |
| Emu-Ebendo   | OUT-D1  | <LOQ | <LOQ  | <LOQ  | <LOQ  | 28.0  | 156   | 0.60 | 0.28 | 1.80  | 2.60 | 24.4 | 56    | 124   | 290   | 126    | 620   | <b>872</b>    | <LOQ          | 184    | 5.28  | 494   | 188    |       |
|              | OUT-D2  | 1520 | 1290  | 2530  | 3280  | 954   | 2080  | 1120 | 3680 | 587   | 420  | 475  | 454   | 1210  | 102   | 0.70   | 9.20  | <b>19700</b>  | 1520          | 10100  | 5810  | 2240  | 9.9    |       |
|              | OUT-D3  | 0.8  | 1.00  | 0.80  | 0.40  | 0.60  | 1.60  | 0.80 | 0.20 | 2.00  | 4.00 | 10   | 304   | 178   | 104   | 960    | 720   | <b>774</b>    | 0.8           | 4.40   | 7.00  | 596   | 168    |       |
|              | OUT-D4  | 0.68 | 0.56  | 0.66  | 0.6   | 0.44  | 0.9   | 0.36 | 0.22 | 1.66  | 1.60 | 13.6 | 108   | 136   | 80    | 56     | 112   | <b>512</b>    | 0.68          | 3.16   | 3.84  | 338   | 168    |       |
|              | OUT-D5  | 0.16 | 0.28  | 0.86  | 0.52  | 0.54  | 1.20  | 1.20 | 0.40 | 1.20  | 7.80 | 16   | 111   | 112   | 66    | 34     | 104   | <b>457</b>    | 0.16          | 3.40   | 10.6  | 305   | 138    |       |
|              | OUT-D6  | 0.60 | 0.40  | 2.34  | 0.36  | 1.50  | 1.70  | 3.34 | 0.84 | 2200  | 57.9 | 84.9 | 29.4  | 38.1  | 175   | 52.4   | 138   | <b>2790</b>   | 0.60          | 6.30   | 2270  | 328   | 191    |       |
|              | OUT-D7  | 1.32 | 0.7   | 0.72  | 0.78  | 2.60  | 0.54  | 0.9  | 0.98 | 3.60  | 2.40 | 8    | 24.6  | 70    | 20    | 118    | 92.4  | <b>347</b>    | 1.32          | 5.34   | 7.88  | 123   | 210    |       |
|              | OUT-D8  | 0.62 | 1.92  | 0.24  | 4.40  | 0.34  | 2.8   | 0.34 | 0.24 | 2.44  | 14.6 | 16.8 | 67.4  | 266   | 138   | 110    | 60.8  | <b>687</b>    | 0.62          | 9.7    | 17.6  | 488   | 171    |       |
|              | OUT-D9  | 0.96 | 2.6   | 0.32  | 4.24  | 1.28  | 0.6   | 0.78 | 1.42 | 1.30  | 7.60 | 24.5 | 41.4  | 61.5  | 233   | 94.6   | 103   | <b>579</b>    | 0.96          | 9.04   | 11.1  | 360   | 198    |       |
|              | OUT-D10 | 0.44 | 0.3   | 0.44  | 0.38  | 0.6   | 0.16  | 0.18 | 0.84 | 2.26  | 6.28 | 20.1 | 80.6  | 83.4  | 99.3  | 122    | 57.7  | <b>475</b>    | 0.44          | 1.88   | 9.56  | 283   | 179    |       |
| Otu-Jeremi   | OUT-D1  | 4.82 | 8.88  | 0.16  | 0.56  | 24.6  | 40.2  | 0.7  | 12.5 | <LOQ  | 314  | 3350 | 9090  | 3250  | 10800 | 6950   | 1380  | <b>35200</b>  | 4.82          | 74.4   | 327   | 26500 | 8330   |       |
|              | OUT-D2  | 5.46 | 6.34  | 3.88  | 2.24  | 6.06  | 4.18  | 2.84 | 4.20 | 1.10  | 40.7 | 2940 | <LOQ  | 16000 | <LOQ  | <LOQ   | 51500 | <b>70400</b>  | 5.46          | 22.7   | 48.8  | 18900 | 51500  |       |
|              | OUT-D3  | 28.3 | 34.7  | 8.74  | 2.68  | 5.04  | 8.52  | 2.07 | 1.32 | 1.16  | 3.26 | 480  | <LOQ  | <LOQ  | <LOQ  | 62300  | 14300 | <b>77200</b>  | 28.3          | 59.7   | 7.81  | 480   | 76600  |       |
|              | OUT-D4  | 0.64 | 4.46  | 0.56  | 2.02  | 9.18  | 11.8  | 4.34 | 10.4 | 213   | <LOQ | 6280 | <LOQ  | <LOQ  | <LOQ  | <LOQ   | 68200 | <b>74700</b>  | 0.64          | 28.0   | 228   | 6280  | 68200  |       |
|              | OUT-D5  | 1.06 | 6.32  | 1.76  | 6.96  | 15.3  | 19.6  | 1.46 | 7.32 | 26.5  | <LOQ | <LOQ | <LOQ  | <LOQ  | 73500 | <LOQ   | 5340  | <b>78900</b>  | 1.06          | 49.9   | 35.3  | 73500 | 5340   |       |
|              | OUT-D6  | 1.76 | 7.62  | 3.96  | 2.26  | 2.04  | 1.16  | 2.40 | 3.88 | 13.00 | 137  | 906  | <LOQ  | <LOQ  | 52800 | 5830   | 53500 | <b></b>       |               |        |       |       |        |       |



|              |         |       |       |       |       |       |      |      |       |      |      |       |       |       |       |       |       |              |             |      |       |       |      |      |
|--------------|---------|-------|-------|-------|-------|-------|------|------|-------|------|------|-------|-------|-------|-------|-------|-------|--------------|-------------|------|-------|-------|------|------|
| Ugono-Abraka | OUT-D6  | 14.5  | 3.58  | 0.50  | 5.46  | 0.70  | 1.88 | 0.40 | 15.8  | 1.96 | 26.4 | 367   | 150   | 1660  | 735   | 136   | 1510  | <b>4630</b>  | 14.5        | 12.1 | 44.5  | 2910  | 1640 |      |
|              | OUT-D7  | 2.52  | 1.92  | 5.72  | 1110  | 1790  | 2150 | 1640 | 1550  | 2090 | 1710 | 2240  | 57.8  | 136   | 3760  | 2470  | 112   | <b>20800</b> | 2.52        | 5060 | 6980  | 6200  | 2580 |      |
|              | OUT-D8  | 1.48  | 1.16  | 3.86  | 0.84  | 21.8  | 1.44 | 0.48 | 4.8   | 10.6 | 13.1 | 41.3  | 221   | 582   | 571   | 191   | 111   | <b>1780</b>  | 1.48        | 29.1 | 29.0  | 1420  | 302  |      |
|              | OUT-D9  | 17.5  | 3.64  | 20.6  | 8.28  | 16.0  | 28.7 | 294  | 1610  | 1570 | 1770 | 2080  | 9250  | 3800  | 5810  | 2080  | 3320  | <b>31700</b> | 17.5        | 77.2 | 5240  | 20900 | 5400 |      |
|              | OUT-D10 | 13.00 | 6.76  | 2.66  | 26.6  | 89.4  | 29.8 | 0.48 | 1300  | 1230 | 8340 | 14500 | 5120  | 1850  | 6090  | 5800  | 1980  | <b>46300</b> | 13.0        | 155  | 10900 | 27500 | 7770 |      |
|              | OUT-D1  | 10.00 | 26.0  | 32.0  | 12.0  | 10.0  | 20.0 | 12.0 | 22.0  | 22.0 | 32.0 | 36.0  | 40.0  | 54.0  | 86.0  | 70.0  | 76.0  | <b>560</b>   | 10.0        | 100  | 88.0  | 216   | 146  |      |
|              | OUT-D2  | 842   | 62.0  | 66.0  | 26.0  | 52.0  | 72.0 | 22.0 | 26.0  | 10.0 | 12.0 | 22.0  | 12.0  | 14.0  | 26.0  | 22.0  | 28.0  | <b>1310</b>  | 842         | 278  | 70.0  | 74.0  | 50.0 |      |
|              | OUT-D3  | 12.00 | 10.00 | 12.00 | 10.00 | 10.00 | 8.00 | 4.00 | 10.00 | 6.00 | 4.00 | 6.00  | 6.00  | 6.00  | 6.00  | 6.00  | 26.00 | 18.00        | <b>154</b>  | 12.0 | 50.0  | 24.0  | 24.0 | 44.0 |
|              | OUT-D4  | 66.0  | 4.00  | 244   | 270   | 476   | 1200 | 148  | 6.00  | 28.0 | 42.0 | 20.0  | 34.00 | 34.00 | 24.00 | 30.00 | 54.00 | <b>2680</b>  | 66.0        | 2200 | 224   | 112.0 | 84.0 |      |
|              | OUT-D5  | <LOQ  | <LOQ  | <LOQ  | <LOQ  | <LOQ  | <LOQ | <LOQ | <LOQ  | <LOQ | <LOQ | 670   | 1060  | 618   | 1650  | 926   | 1200  | 880          | <b>7000</b> | <LOQ | <LOQ  | 670   | 4250 | 2080 |

(a)

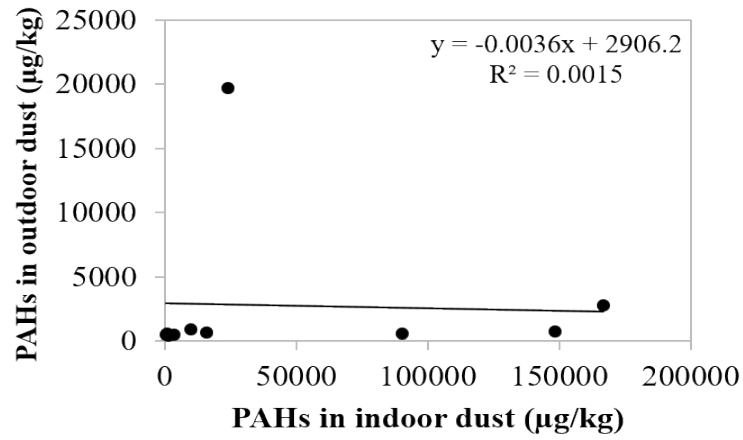

(b)

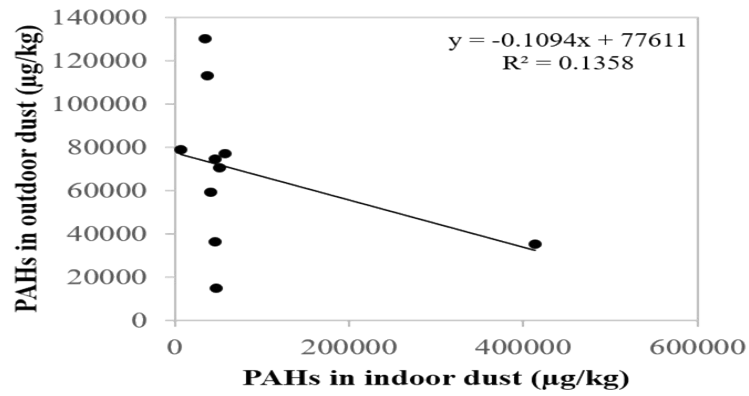

(c)

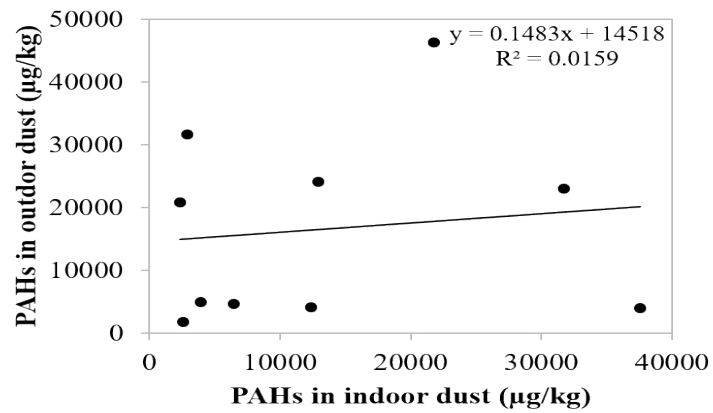

**Figure S1:** Correlation between  $\sum 16$  PAH concentrations in indoor dust with those of outdoor dust in (a) Emu-Ebendo, (b) Otu-Jeremi and (c) Ebedei

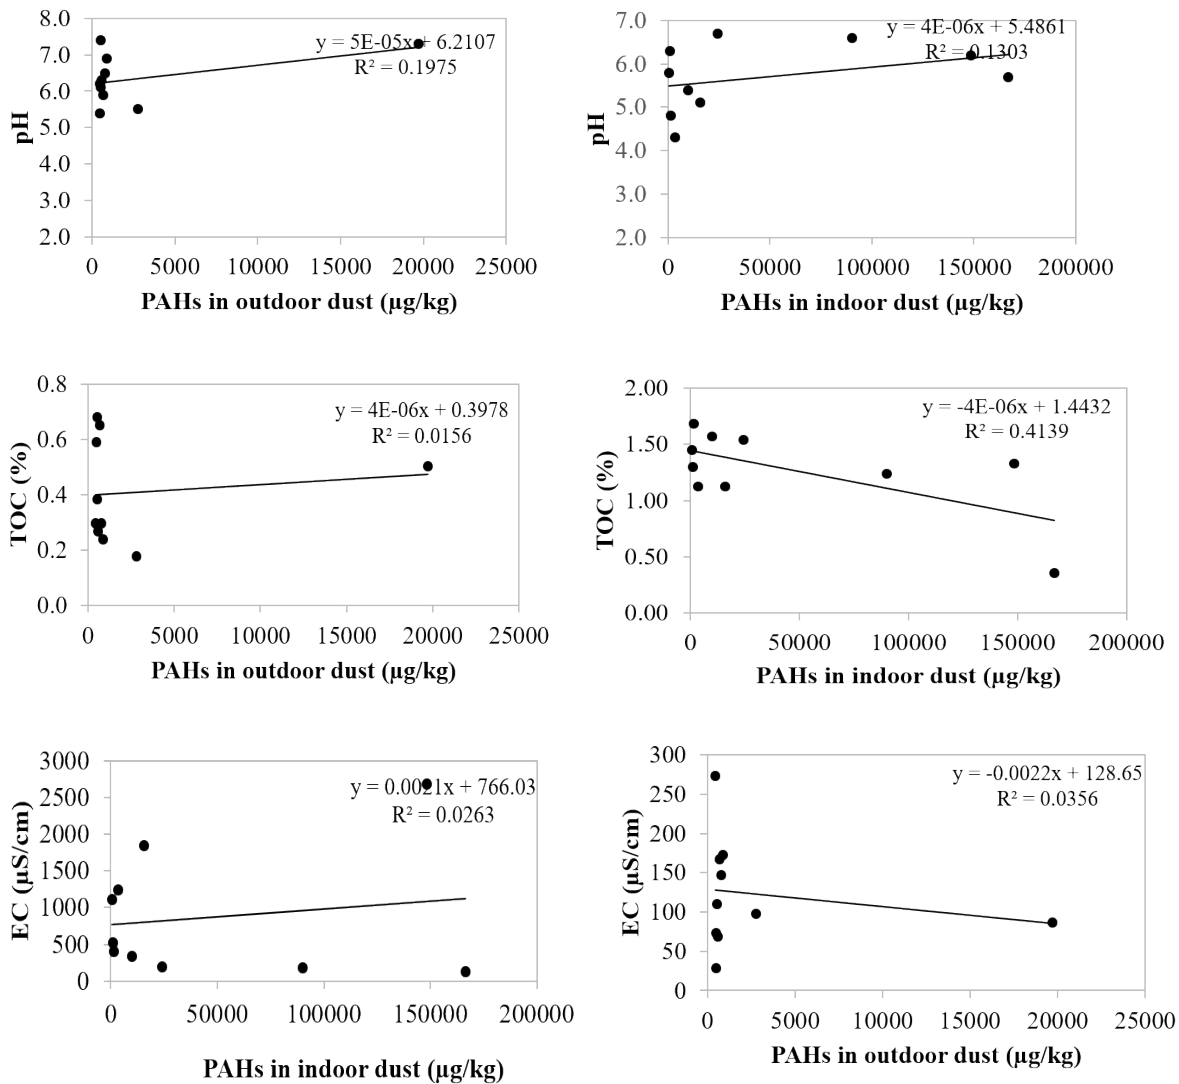

**Figure S2:** Correlation plots of physicochemical parameters against TPAHs in indoor and outdoor dusts of Emu-Ebendo

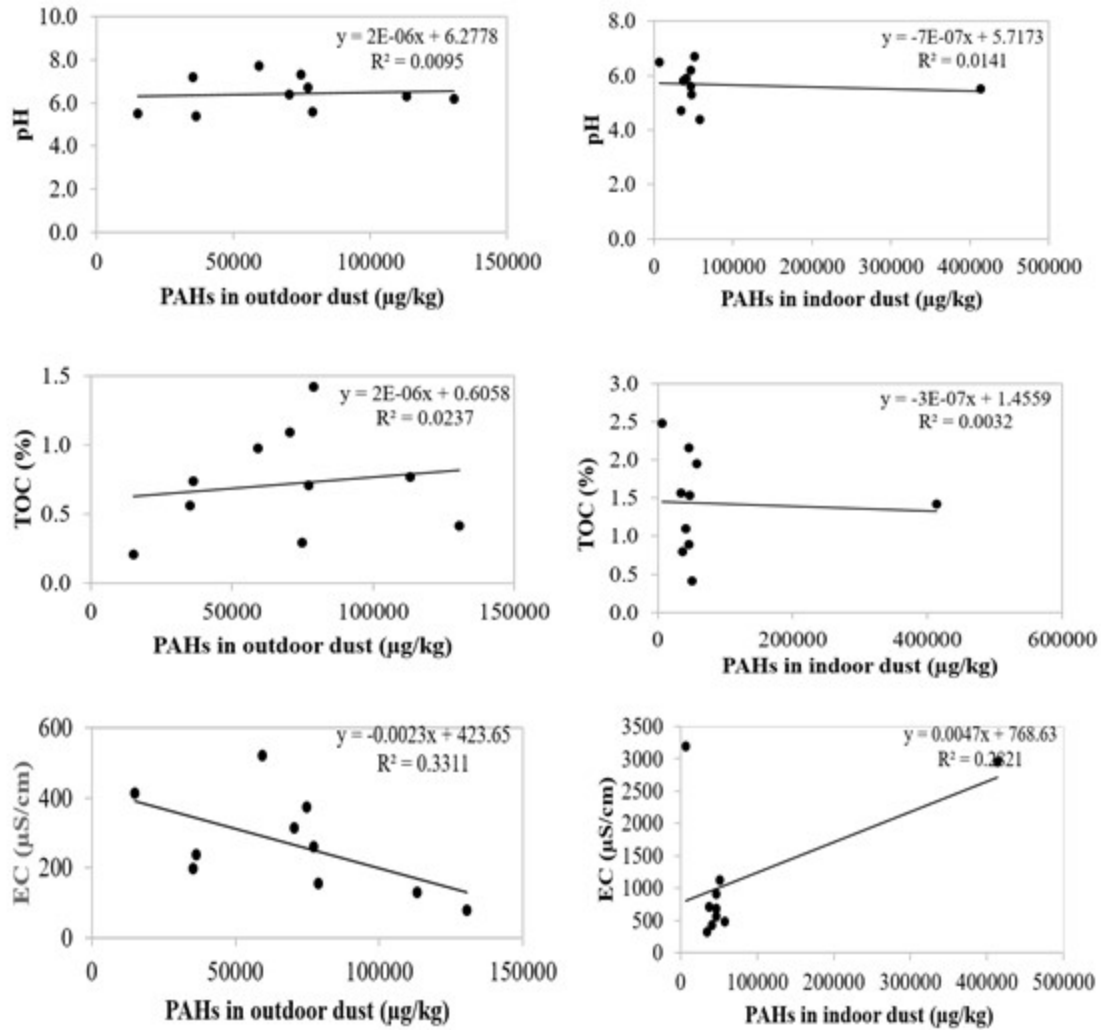

**Figure S3:** Correlation plots of physicochemical parameters against TPAHs in indoor and outdoor dusts of Otu-Jeremi

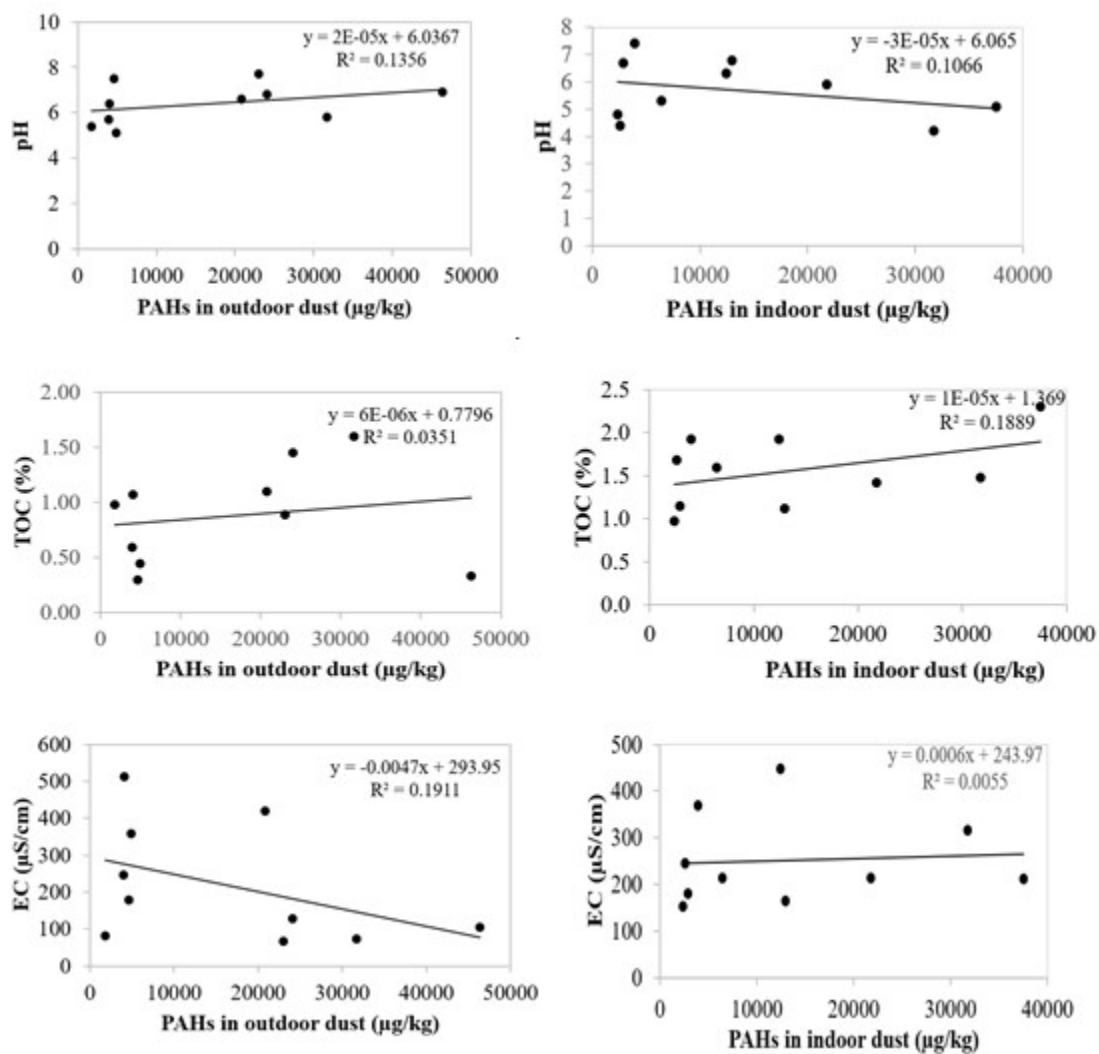

**Figure S4:** Correlation plots of physicochemical parameters against TPAHs in indoor and outdoor dusts of Ebedei

**Table S6:**  $\sum$ RQ<sub>(NCs)</sub> of PAHs in indoor and outdoor dust from rural communities around gas flaring points

|            |         | Nap   | Acc   | Acy   | Flu   | Phen  | Ant   | Flt  | Pyr   | BaA   | Chry  | BbF   | BkF  | BaP  | DahA  | IndP | BghiP | $\sum$ RQ <sub>(NCs)</sub> |
|------------|---------|-------|-------|-------|-------|-------|-------|------|-------|-------|-------|-------|------|------|-------|------|-------|----------------------------|
| Emu-Ebendo | IN-D1   | 21.4  | 51.7  | 35.0  | 10.0  | 247   | 2930  | 1.92 | 5.00  | 18.4  | 0.45  | 71.2  | 18.2 | 390  | 423   | 6.47 | 21.6  | <b>4260</b>                |
|            | IN-D2   | 330   | 207   | 38.3  | 5.00  | 1910  | 2950  | 13.8 | 340   | 81.6  | 5.18  | 170   | 58.0 | 800  | 969   | 21.7 | 10.6  | <b>7910</b>                |
|            | IN-D3   | 1460  | 10700 | 23900 | 36300 | 2990  | 16100 | 342  | 2820  | 963   | 5.64  | 609   | 65.6 | 1370 | 453   | 33.5 | 21.5  | <b>98200</b>               |
|            | IN-D4   | 11.4  | 5.00  | 167   | 123   | 130   | 217   | 4.62 | 110   | 17.6  | 0.99  | 36.0  | 8.83 | 216  | 100   | 3.56 | 4.35  | <b>1150</b>                |
|            | IN-D5   | 1.43  | 0.13  | 0.22  | 1.18  | 0.24  | 0.30  | 0.07 | 0.20  | 2.24  | 0.13  | 6.40  | 6.5  | 102  | 252   | 2.78 | 0.80  | <b>375</b>                 |
|            | IN-D6   | 0.00  | 0.00  | 0.00  | 0.00  | 0.00  | 0.00  | 0.38 | 43.3  | 5.60  | 38.9  | 10600 | 1730 | 213  | 32100 | 146  | 25.3  | <b>44900</b>               |
|            | IN-D7   | 0.000 | 0.000 | 0.000 | 0.000 | 0.000 | 11.7  | 0.38 | 66.7  | 3.20  | 4.67  | 0.00  | 0.00 | 2420 | 25200 | 247  | 41.9  | <b>28000</b>               |
|            | IN-D8   | 0.00  | 6.67  | 11.7  | 3.33  | 1.18  | 6.67  | 0.31 | 3.33  | 4.80  | 0.50  | 0.00  | 0.00 | 0    | 0     | 175  | 70.4  | <b>283</b>                 |
|            | IN-D9   | 0.17  | 0.47  | 0.93  | 0.42  | 0.33  | 7.43  | 0.01 | 0.37  | 0.3   | 0.30  | 18.4  | 1.08 | 82.3 | 106   | 1.69 | 0.91  | <b>217</b>                 |
|            | IN-D10  | 0.26  | 1.02  | 0.98  | 0.30  | 0.15  | 2.28  | 0.01 | 1.47  | 0.25  | 0.09  | 8.32  | 1.58 | 42.3 | 56.2  | 1.73 | 1.63  | <b>116</b>                 |
| Otu-Jeremi | IN-D1   | 0.00  | 2.20  | 0.33  | 17.3  | 2.37  | 2.9   | 0.35 | 0.000 | 0.000 | 0.000 | 0.000 | 0.00 | 0.00 | 0.00  | 6870 | 109   | <b>7000</b>                |
|            | IN-D2   | 0.53  | 2.78  | 4.08  | 4.50  | 0.06  | 3.47  | 0.26 | 4.47  | 11.6  | 1.79  | 153   | 184  | 0.00 | 0.00  | 0.00 | 612   | <b>981</b>                 |
|            | IN-D3   | 8.86  | 103   | 6.92  | 31.3  | 2.27  | 1.05  | 0.16 | 7.98  | 0.72  | 0.00  | 0.00  | 225  | 0.00 | 0.00  | 0.00 | 695   | <b>1080</b>                |
|            | IN-D4   | 31.2  | 28.9  | 9.33  | 6.12  | 1.31  | 3.02  | 0.08 | 1.27  | 1.06  | 0.14  | 610   | 0    | 0    | 13800 | 81   | 56.1  | <b>14600</b>               |
|            | IN-D5   | 1.41  | 14.8  | 3.12  | 2.42  | 1.08  | 2.35  | 0.12 | 1.7   | 0.41  | 0     | 0     | 0    | 0    | 0     | 106  | 3.72  | <b>137</b>                 |
|            | IN-D6   | 1.21  | 7.4   | 0.93  | 1.63  | 1.86  | 1.35  | 0.14 | 4.8   | 0     | 0.26  | 1020  | 0    | 0    | 9490  | 155  | 8.63  | <b>10700</b>               |
|            | IN-D7   | 2.53  | 25.5  | 2.72  | 1.03  | 1.13  | 0.78  | 0.2  | 4.4   | 1.14  | 0.02  | 679   | 0    | 0    | 7750  | 297  | 22.2  | <b>8790</b>                |
|            | IN-D8   | 4.03  | 16.6  | 4.28  | 2.72  | 1.59  | 3.38  | 0.05 | 2.88  | 0.52  | 0     | 590   | 0    | 0    | 9930  | 43.2 | 58.5  | <b>10700</b>               |
|            | IN-D9   | 6.13  | 10.4  | 8.5   | 0.7   | 3.14  | 6.42  | 0.01 | 1.72  | 77.6  | 0     | 142   | 104  | 5530 | 4110  | 36.4 | 225   | <b>10300</b>               |
|            | IN-D10  | 4.91  | 11.3  | 2.93  | 1.48  | 0.43  | 1.73  | 0.09 | 2.92  | 7.28  | 0     | 299   | 169  | 0    | 8910  | 164  | 118   | <b>9690</b>                |
| Ebedei     | IN-D1   | 0.77  | 1.88  | 4.88  | 11.9  | 0.11  | 58.7  | 6.13 | 792   | 968   | 26.7  | 620   | 183  | 3720 | 546   | 70.1 | 54.3  | <b>7060</b>                |
|            | IN-D2   | 0.2   | 6.93  | 0.45  | 3.6   | 4.28  | 23.2  | 2.4  | 757   | 670   | 24.6  | 506   | 214  | 3940 | 4120  | 13.6 | 53.5  | <b>10300</b>               |
|            | IN-D3   | 135   | 1240  | 855   | 1370  | 424   | 2040  | 22.2 | 834   | 162   | 0.04  | 7.98  | 1.83 | 240  | 153   | 0.01 | 4.99  | <b>7490</b>                |
|            | IN-D4   | 40.7  | 2820  | 875   | 882   | 220   | 1940  | 10   | 1340  | 329   | 0.05  | 4     | 0.84 | 198  | 99    | 0.59 | 5.69  | <b>8760</b>                |
|            | IN-D5   | 1.43  | 0.85  | 1.63  | 4.23  | 0.2   | 1.88  | 0.05 | 2.57  | 2.08  | 0.05  | 14.1  | 4.19 | 654  | 200   | 6.69 | 15.4  | <b>908</b>                 |
|            | IN-D6   | 0.00  | 2.17  | 592   | 910   | 260   | 1269  | 12.6 | 45.1  | 53.9  | 0.02  | 1.85  | 0.81 | 276  | 52.5  | 3.92 | 1.82  | <b>3480</b>                |
|            | IN-D7   | 0.37  | 1.23  | 0.68  | 1.08  | 0.32  | 0.95  | 0.05 | 0.98  | 0.97  | 0.05  | 26.8  | 34.2 | 296  | 159   | 2.46 | 1.56  | <b>522</b>                 |
|            | IN-D8   | 1.11  | 14.4  | 0.92  | 2.47  | 0.34  | 19.4  | 0.07 | 0.57  | 0.9   | 0.12  | 23.9  | 1.36 | 674  | 102   | 2.32 | 3.52  | <b>845</b>                 |
|            | IN-D9   | 0.2   | 1.38  | 3.62  | 70    | 0.12  | 0.67  | 0.04 | 3.23  | 2.4   | 0.17  | 4.55  | 15.4 | 331  | 408   | 4.82 | 2.16  | <b>847</b>                 |
|            | IN-D10  | 2.27  | 1.45  | 2.93  | 8.92  | 9.05  | 67.8  | 19.8 | 1425  | 758   | 16.2  | 1209  | 87.7 | 1215 | 1553  | 49   | 7.26  | <b>6430</b>                |
| Emu-Ebendo | OUT-D1  | 0.000 | 0.000 | 0.000 | 0.000 | 5.49  | 130   | 0.02 | 0.23  | 0.72  | 0.02  | 9.76  | 2.33 | 47.7 | 112   | 2.14 | 0.83  | <b>309</b>                 |
|            | OUT-D2  | 1080  | 1080  | 2110  | 2730  | 187   | 1730  | 43.2 | 3070  | 235   | 3.93  | 190   | 18.9 | 466  | 39.1  | 0.01 | 0.12  | <b>13000</b>               |
|            | OUT-D3  | 0.57  | 0.83  | 0.67  | 0.33  | 0.12  | 1.3   | 0.03 | 0.17  | 0.8   | 0.04  | 4.00  | 12.7 | 68.5 | 40    | 1.63 | 0.96  | <b>128</b>                 |
|            | OUT-D4  | 0.49  | 0.47  | 0.55  | 0.50  | 0.09  | 0.75  | 0.01 | 0.18  | 0.66  | 0.01  | 5.44  | 4.5  | 52.3 | 30.8  | 0.95 | 1.49  | <b>94.5</b>                |
|            | OUT-D5  | 0.11  | 0.23  | 0.72  | 0.43  | 0.11  | 1.00  | 0.05 | 0.33  | 0.48  | 0.07  | 6.4   | 4.64 | 43   | 25.4  | 0.58 | 1.39  | <b>81.8</b>                |
|            | OUT-D6  | 0.43  | 0.33  | 1.95  | 0.30  | 0.29  | 1.42  | 0.13 | 0.7   | 882   | 0.54  | 34.0  | 1.23 | 14.6 | 67.4  | 0.89 | 1.85  | <b>1000</b>                |
|            | OUT-D7  | 0.94  | 0.58  | 0.6   | 0.65  | 0.51  | 0.45  | 0.03 | 0.82  | 1.44  | 0.02  | 3.2   | 1.03 | 26.9 | 7.69  | 2.00 | 1.23  | <b>43.5</b>                |
|            | OUT-D8  | 0.44  | 1.6   | 0.2   | 3.67  | 0.07  | 2.33  | 0.01 | 0.2   | 0.98  | 0.14  | 6.72  | 2.81 | 102  | 53.1  | 1.86 | 0.81  | <b>174</b>                 |
|            | OUT-D9  | 0.69  | 2.17  | 0.27  | 3.53  | 0.25  | 0.5   | 0.03 | 1.18  | 0.52  | 0.07  | 9.8   | 1.73 | 23.7 | 89.5  | 1.60 | 1.37  | <b>135</b>                 |
|            | OUT-D10 | 0.31  | 0.25  | 0.37  | 0.32  | 0.12  | 0.13  | 0.01 | 0.7   | 0.9   | 0.06  | 8.05  | 3.36 | 32.1 | 38.2  | 2.06 | 0.77  | <b>83.7</b>                |
| Otu-Jeremi | OUT-D1  | 3.44  | 7.4   | 0.13  | 0.47  | 4.82  | 33.5  | 0.03 | 10.4  | 0     | 2.93  | 1340  | 379  | 1250 | 4150  | 118  | 18.4  | <b>7320</b>                |
|            | OUT-D2  | 3.90  | 5.28  | 3.23  | 1.87  | 1.19  | 3.48  | 0.11 | 3.50  | 0.44  | 0.38  | 1180  | 0    | 6130 | 0     | 0    | 686   | <b>8010</b>                |
|            | OUT-D3  | 20.2  | 28.9  | 7.28  | 2.23  | 0.99  | 7.1   | 0.08 | 1.10  | 0.46  | 0.03  | 192   | 0    | 0    | 0     | 1056 | 191   | <b>1510</b>                |
|            | OUT-D4  | 0.46  | 3.72  | 0.47  | 1.68  | 1.8   | 9.83  | 0.17 | 8.67  | 85.2  | 0     | 2510  | 0    | 0    | 0     | 0    | 909   | <b>3530</b>                |
|            | OUT-D5  | 0.76  | 5.27  | 1.47  | 5.8   | 3.00  | 16.3  | 0.06 | 6.10  | 10.6  | 0     | 0     | 0    | 0    | 28300 | 0    | 71.3  | <b>28400</b>               |
|            | OUT-D6  | 1.26  | 6.35  | 3.3   | 1.88  | 0.4   | 0.97  | 0.09 | 3.23  | 5.2   | 1.28  | 362   | 0    | 0    | 20300 | 98.9 | 714   | <b>21500</b>               |
|            | OUT-D7  | 0.69  | 66.4  | 27.9  | 0.65  | 1.04  | 1.48  | 0.09 | 2.05  | 0.92  | 0.27  | 0     | 532  | 0    | 14900 | 0    | 102   | <b>15600</b>               |
|            | OUT-D8  | 0.97  | 3.22  | 2.08  | 0.47  | 3.43  | 11.7  | 0.17 | 1.83  | 1.61  | 0     | 0     | 0    | 0    | 0     | 1110 | 858   | <b>1990</b>                |
|            | OUT-D9  | 21.3  | 44.7  | 105   | 90.0  | 286   | 1100  | 25.9 | 592   | 412   | 4.83  | 306   | 51.3 | 768  | 948   | 29.0 | 10.1  | <b>4790</b>                |
|            | OUT-D10 | 1.73  | 248   | 27.5  | 4.25  | 15    | 21.2  | 14.9 | 0.8   | 2.46  | 5.86  | 87.2  | 43.8 | 4660 | 4650  | 10.5 | 117   | <b>9900</b>                |
| Ebedei     | OUT-D1  | 321   | 4540  | 3720  | 1850  | 632   | 2249  | 65.2 | 887   | 618   | 0.08  | 3.06  | 0.49 | 29.4 | 31.1  | 0.18 | 0.05  | <b>14900</b>               |
|            | OUT-D2  | 0     | 2.22  | 5.37  | 3.03  | 0.17  | 1.77  | 0.13 | 7.70  | 10.8  | 0.32  | 36.6  | 24.1 | 986  | 85.7  | 4.66 | 1.59  | <b>1170</b>                |
|            | OUT-D3  | 1.71  | 2.18  | 0.63  | 1.02  | 0.15  | 2.07  | 0.06 | 3.88  | 1.73  | 0.07  | 53.1  | 17.9 | 1050 | 165   | 1.44 | 2.94  | <b>1300</b>                |
|            | OUT-D4  | 0.29  | 2.13  | 3410  | 2810  | 1078  | 893   | 17.6 | 4660  | 4.66  | 0.05  | 1350  | 0.22 | 139  | 48.1  | 0.68 | 0.31  | <b>14400</b>               |
|            | OUT-D5  | 3.23  | 2.10  | 2.07  | 1.38  | 0.13  | 0.70  | 0.47 | 2.95  | 4.93  | 0.14  | 724   | 12.8 | 755  | 95.2  | 4.72 | 3.16  | <b>1610</b>                |
|            | OUT-D6  | 10.3  | 2.98  | 0.42  | 4.55  | 0.14  | 1.57  | 0.02 | 13.2  | 0.78  | 0.25  | 147   | 6.25 | 639  | 283   | 2.3  | 20.1  | <b>1130</b>                |
|            | OUT-D7  | 1.80  | 1.60  | 4.77  | 926   | 352   | 1787  | 62.9 | 1288  | 837   | 16    | 896   | 2.41 | 52.3 | 1447  | 41.8 | 1.49  | <b>7719</b>                |
|            | OUT-D8  | 1.06  | 0.97  | 3.22  | 0.70  | 4.27  | 1.20  | 0.02 | 4.00  | 4.25  | 0.12  | 16.5  | 9.19 | 224  | 220   | 3.24 | 1.47  | <b>492</b>                 |
|            | OUT-D9  | 12.5  | 3.03  | 17.2  | 6.90  | 3.13  | 23.9  | 11.3 | 1340  | 628   | 16.5  | 831   | 385  | 1461 | 2233  | 35.3 | 44.2  | <b>7053</b>                |
|            | OUT-D10 | 9.26  | 5.63  | 2.22  | 22.2  | 17.5  | 24.8  | 0.02 | 1084  | 490   | 78    | 5779  | 213  | 712  | 2342  | 98.3 | 26.3  | <b>10905</b>               |

**Table S7:**  $\Sigma$ RQ<sub>(MPCs)</sub> of PAHs in indoor and outdoor dust from rural communities around gas flaring points

|            |         | Nap  | Acc  | Acy  | Flu  | Phen | Ant   | Flt  | Pyr  | BaA  | Chry | BbF  | BkF  | BaP  | DahA   | IndP | BghiP | $\Sigma$ RQ <sub>(MPCs)</sub> |
|------------|---------|------|------|------|------|------|-------|------|------|------|------|------|------|------|--------|------|-------|-------------------------------|
| Emu-Ebendo | IN-D1   | 0.21 | 0.52 | 0.35 | 0.1  | 2.47 | 29.3  | 0.02 | 0.05 | 0.18 | 0    | 0.71 | 0.18 | 3.9  | 4.23   | 0.06 | 0.22  | 39.9                          |
|            | IN-D2   | 3.3  | 2.07 | 0.38 | 0.05 | 19.1 | 29.5  | 0.14 | 3.4  | 0.82 | 0.05 | 1.7  | 0.58 | 8    | 9.69   | 0.22 | 0.11  | 76.8                          |
|            | IN-D3   | 14.6 | 107  | 239  | 363  | 29.9 | 161   | 3.42 | 28.2 | 9.63 | 0.06 | 6.09 | 0.66 | 13.7 | 4.53   | 0.33 | 0.21  | 981                           |
|            | IN-D4   | 0.11 | 0.05 | 1.67 | 1.23 | 1.3  | 2.17  | 0.05 | 1.1  | 0.18 | 0.01 | 0.36 | 0.09 | 2.16 | 1.00   | 0.04 | 0.04  | 10.6                          |
|            | IN-D5   | 0.01 | 0    | 0    | 0.01 | 0    | 0     | 0    | 0    | 0.02 | 0    | 0.06 | 0.07 | 1.02 | 2.52   | 0.03 | 0.01  | 3.55                          |
|            | IN-D6   | 0    | 0    | 0    | 0    | 0    | 0     | 0    | 0.43 | 0.06 | 0.39 | 106  | 17.3 | 2.13 | 321.00 | 1.46 | 0.25  | 448                           |
|            | IN-D7   | 0    | 0    | 0    | 0    | 0    | 0.12  | 0    | 0.67 | 0.03 | 0.05 | 0    | 0    | 24.2 | 252.00 | 2.47 | 0.42  | 279                           |
|            | IN-D8   | 0    | 0.07 | 0.12 | 0.03 | 0.01 | 0.07  | 0    | 0.03 | 0.05 | 0.01 | 0    | 0    | 0    | 0      | 0.00 | 1.75  | 0.7                           |
|            | IN-D9   | 0    | 0    | 0.01 | 0    | 0    | 0.07  | 0    | 0    | 0    | 0    | 0.18 | 0.01 | 0.82 | 1.06   | 0.02 | 0.01  | 1.06                          |
|            | IN-D10  | 0    | 0.01 | 0.01 | 0    | 0    | 0.02  | 0    | 0.01 | 0    | 0    | 0.08 | 0.02 | 0.42 | 0.56   | 0.02 | 0.02  | 0.00                          |
| Otu-Jeremi | IN-D1   | 0    | 0.02 | 0    | 0.17 | 0.02 | 0.03  | 0    | 0    | 0    | 0    | 0    | 0    | 0    | 0.00   | 68.7 | 1.09  | 69.8                          |
|            | IN-D2   | 0.01 | 0.03 | 0.04 | 0.05 | 0    | 0.03  | 0    | 0.04 | 0.12 | 0.02 | 1.53 | 1.84 | 0    | 0.00   | 0    | 6.12  | 9.48                          |
|            | IN-D3   | 0.09 | 1.03 | 0.07 | 0.31 | 0.02 | 0.01  | 0    | 0.08 | 0.01 | 0    | 0    | 2.25 | 0    | 0.00   | 0    | 6.95  | 10.2                          |
|            | IN-D4   | 0.31 | 0.29 | 0.09 | 0.06 | 0.01 | 0.03  | 0    | 0.01 | 0.01 | 0    | 6.1  | 0    | 0    | 138.00 | 0.81 | 0.56  | 144                           |
|            | IN-D5   | 0.01 | 0.15 | 0.03 | 0.02 | 0.01 | 0.02  | 0    | 0.02 | 0    | 0    | 0    | 0    | 0    | 0.00   | 1.06 | 0.04  | 1.06                          |
|            | IN-D6   | 0.01 | 0.07 | 0.01 | 0.02 | 0.02 | 0.01  | 0    | 0.05 | 0    | 0    | 10.2 | 0    | 0    | 94.90  | 1.55 | 0.09  | 107                           |
|            | IN-D7   | 0.03 | 0.26 | 0.03 | 0.01 | 0.01 | 0.01  | 0    | 0.04 | 0.01 | 0    | 6.79 | 0    | 0    | 77.50  | 2.97 | 0.22  | 87.3                          |
|            | IN-D8   | 0.04 | 0.17 | 0.04 | 0.03 | 0.02 | 0.03  | 0    | 0.03 | 0.01 | 0    | 5.9  | 0    | 0    | 99.30  | 0.43 | 0.58  | 105                           |
|            | IN-D9   | 0.06 | 0.1  | 0.09 | 0.01 | 0.03 | 0.06  | 0    | 0.02 | 0.78 | 0    | 1.42 | 1.04 | 55.3 | 41.10  | 0.36 | 2.25  | 101                           |
|            | IN-D10  | 0.05 | 0.11 | 0.03 | 0.01 | 0    | 0.02  | 0    | 0.03 | 0.07 | 0    | 2.99 | 1.69 | 0    | 89.10  | 1.64 | 1.18  | 96.6                          |
| Ebedei     | IN-D1   | 0.01 | 0.02 | 0.05 | 0.12 | 0    | 0.59  | 0.06 | 7.92 | 9.68 | 0.27 | 6.2  | 1.83 | 37.2 | 5.46   | 0.7  | 0.54  | 68.3                          |
|            | IN-D2   | 0    | 0.07 | 0    | 0.04 | 0.04 | 0.23  | 0.02 | 7.57 | 6.7  | 0.25 | 5.06 | 2.14 | 39.4 | 41.20  | 0.14 | 0.54  | 102                           |
|            | IN-D3   | 1.35 | 12.4 | 8.55 | 13.7 | 4.24 | 20.4  | 0.22 | 8.34 | 1.62 | 0    | 0.08 | 0.02 | 2.4  | 1.53   | 0    | 0.05  | 74.5                          |
|            | IN-D4   | 0.41 | 28.2 | 8.75 | 8.82 | 2.2  | 19.4  | 0.1  | 13.4 | 3.29 | 0    | 0.04 | 0.01 | 1.98 | 0.99   | 0.01 | 0.06  | 86                            |
|            | IN-D5   | 0.01 | 0.01 | 0.02 | 0.04 | 0    | 0.02  | 0    | 0.03 | 0.02 | 0    | 0.14 | 0.04 | 6.54 | 2.00   | 0.07 | 0.15  | 8.54                          |
|            | IN-D6   | 0    | 0.02 | 5.92 | 9.1  | 2.6  | 12.7  | 0.13 | 0.45 | 0.54 | 0    | 0.02 | 0.01 | 2.76 | 0.53   | 0.04 | 0.02  | 33.1                          |
|            | IN-D7   | 0    | 0.01 | 0.01 | 0.01 | 0    | 0.01  | 0    | 0.01 | 0.01 | 0    | 0.27 | 0.34 | 2.96 | 1.59   | 0.02 | 0.02  | 4.54                          |
|            | IN-D8   | 0.01 | 0.14 | 0.01 | 0.02 | 0    | 0.19  | 0    | 0.01 | 0.01 | 0    | 0.24 | 0.01 | 6.74 | 1.02   | 0.02 | 0.04  | 7.76                          |
|            | IN-D9   | 0    | 0.01 | 0.04 | 0.7  | 0    | 0.01  | 0    | 0.03 | 0.02 | 0    | 0.05 | 0.15 | 3.31 | 4.08   | 0.05 | 0.02  | 7.39                          |
|            | IN-D10  | 0.02 | 0.01 | 0.03 | 0.09 | 0.09 | 0.68  | 0.2  | 14.3 | 7.58 | 0.16 | 12.1 | 0.88 | 12.1 | 15.50  | 0.49 | 0.07  | 61.6                          |
| Emu-Ebendo | OUT-D1  | 0    | 0    | 0    | 0    | 0.05 | 1.3   | 0    | 0    | 0.01 | 0    | 0.1  | 0.02 | 0.48 | 1.12   | 0.02 | 0.01  | 2.42                          |
|            | OUT-D2  | 10.8 | 10.8 | 21.1 | 27.3 | 1.87 | 17.3  | 0.43 | 30.7 | 2.35 | 0.04 | 1.9  | 0.19 | 4.66 | 0.39   | 0    | 0     | 129                           |
|            | OUT-D3  | 0.01 | 0.01 | 0.01 | 0    | 0    | 0.01  | 0    | 0    | 0.01 | 0    | 0.04 | 0.13 | 0.68 | 0.40   | 0.02 | 0.01  | 0                             |
|            | OUT-D4  | 0    | 0    | 0.01 | 0.01 | 0    | 0.01  | 0    | 0    | 0.01 | 0    | 0.05 | 0.05 | 0.52 | 0.31   | 0.01 | 0.01  | 0                             |
|            | OUT-D5  | 0    | 0    | 0.01 | 0    | 0    | 0.01  | 0    | 0    | 0    | 0    | 0.06 | 0.05 | 0.43 | 0.25   | 0.01 | 0.01  | 0                             |
|            | OUT-D6  | 0    | 0    | 0.02 | 0    | 0    | 0.01  | 0    | 0.01 | 8.82 | 0.01 | 0.34 | 0.01 | 0.15 | 0.67   | 0.01 | 0.02  | 8.82                          |
|            | OUT-D7  | 0.01 | 0.01 | 0.01 | 0.01 | 0.01 | 0     | 0    | 0.01 | 0.01 | 0    | 0.03 | 0.01 | 0.27 | 0.08   | 0.02 | 0.01  | 0                             |
|            | OUT-D8  | 0    | 0.02 | 0    | 0.04 | 0    | 0.02  | 0    | 0    | 0.01 | 0    | 0.07 | 0.03 | 1.02 | 0.53   | 0.02 | 0.01  | 1.02                          |
|            | OUT-D9  | 0.01 | 0.02 | 0    | 0.04 | 0    | 0.01  | 0    | 0.01 | 0.01 | 0    | 0.1  | 0.02 | 0.24 | 0.90   | 0.02 | 0.01  | 0                             |
|            | OUT-D10 | 0    | 0    | 0    | 0    | 0    | 0     | 0    | 0.01 | 0.01 | 0    | 0.08 | 0.03 | 0.32 | 0.38   | 0.02 | 0.01  | 0                             |
| Otu-Jeremi | OUT-D1  | 0.03 | 0.07 | 0    | 0    | 0.05 | 0.34  | 0    | 0.1  | 0    | 0.03 | 13.4 | 3.79 | 12.5 | 41.50  | 1.18 | 0.18  | 72.5                          |
|            | OUT-D2  | 0.04 | 0.05 | 0.03 | 0.02 | 0.01 | 0.03  | 0    | 0.04 | 0    | 0    | 11.8 | 0    | 61.3 | 0.00   | 0    | 6.86  | 79.9                          |
|            | OUT-D3  | 0.2  | 0.29 | 0.07 | 0.02 | 0.01 | 0.07  | 0    | 0.01 | 0    | 0    | 1.92 | 0    | 0    | 0.00   | 10.6 | 1.91  | 14.4                          |
|            | OUT-D4  | 0    | 0.04 | 0    | 0.02 | 0.02 | 0.1   | 0    | 0.09 | 0.85 | 0    | 25.1 | 0    | 0    | 0.00   | 0    | 9.09  | 34.2                          |
|            | OUT-D5  | 0.01 | 0.05 | 0.01 | 0.06 | 0.03 | 0.16  | 0    | 0.06 | 0.11 | 0    | 0    | 0    | 0    | 283.00 | 0    | 0.71  | 283                           |
|            | OUT-D6  | 0.01 | 0.06 | 0.03 | 0.02 | 0    | 0.01  | 0    | 0.03 | 0.05 | 0.01 | 3.62 | 0    | 0    | 203.00 | 0.99 | 7.14  | 214                           |
|            | OUT-D7  | 0.01 | 0.66 | 0.28 | 0.01 | 0.01 | 0.01  | 0    | 0.02 | 0.01 | 0    | 0    | 5.32 | 0    | 149.00 | 0    | 1.02  | 155                           |
|            | OUT-D8  | 0.01 | 0.03 | 0.02 | 0    | 0.03 | 0.12  | 0    | 0.02 | 0.02 | 0    | 0    | 0    | 0    | 0.00   | 11.1 | 8.58  | 19.7                          |
|            | OUT-D9  | 0.21 | 0.45 | 1.05 | 0.9  | 2.86 | 10.96 | 0.26 | 5.92 | 4.12 | 0.05 | 3.06 | 0.51 | 7.68 | 9.48   | 0.29 | 0.1   | 45.1                          |
|            | OUT-D10 | 0.02 | 2.48 | 0.28 | 0.04 | 0.15 | 0.21  | 0.15 | 0.01 | 0.02 | 0.06 | 0.87 | 0.44 | 46.6 | 46.50  | 0.11 | 1.17  | 96.7                          |
| Ebedei     | OUT-D1  | 3.21 | 45.4 | 37.2 | 18.5 | 6.32 | 22.5  | 0.65 | 8.87 | 6.18 | 0    | 0.03 | 0    | 0.29 | 0.31   | 0    | 0     | 148                           |
|            | OUT-D2  | 0    | 0.02 | 0.05 | 0.03 | 0    | 0.02  | 0    | 0.08 | 0.11 | 0    | 0.37 | 0.24 | 9.86 | 0.86   | 0.05 | 0.02  | 9.86                          |
|            | OUT-D3  | 0.02 | 0.02 | 0.01 | 0.01 | 0    | 0.02  | 0    | 0.04 | 0.02 | 0    | 0.53 | 0.18 | 10.5 | 1.65   | 0.01 | 0.03  | 12.2                          |
|            | OUT-D4  | 0    | 0.02 | 34.1 | 28.1 | 10.8 | 8.93  | 0.18 | 46.6 | 0.05 | 0    | 13.5 | 0    | 1.39 | 0.48   | 0.01 | 0     | 143                           |
|            | OUT-D5  | 0.03 | 0.02 | 0.02 | 0.01 | 0    | 0.01  | 0    | 0.03 | 0.05 | 0    | 7.24 | 0.13 | 7.55 | 0.95   | 0.05 | 0.03  | 14.8                          |
|            | OUT-D6  | 0.1  | 0.03 | 0    | 0.05 | 0    | 0.02  | 0    | 0.13 | 0.01 | 0    | 1.47 | 0.06 | 6.39 | 2.83   | 0.02 | 0.2   | 10.7                          |
|            | OUT-D7  | 0.02 | 0.02 | 0.05 | 9.26 | 3.52 | 17.9  | 0.63 | 12.9 | 8.37 | 0.16 | 8.96 | 0.02 | 0.52 | 14.50  | 0.42 | 0.01  | 75.3                          |
|            | OUT-D8  | 0.01 | 0.01 | 0.03 | 0.01 | 0.04 | 0.01  | 0    | 0.04 | 0.04 | 0    | 0.17 | 0.09 | 2.24 | 2.20   | 0.03 | 0.01  | 4.43                          |
|            | OUT-D9  | 0.12 | 0.03 | 0.17 | 0.07 | 0.03 | 0.24  | 0.11 | 13.4 | 6.28 | 0.17 | 8.31 | 3.85 | 14.6 | 22.30  | 0.35 | 0.44  | 68.8                          |
|            | OUT-D10 | 0.09 | 0.06 | 0.02 | 0.22 | 17.5 | 0.25  | 0    | 10.8 | 4.9  | 0.78 | 57.8 | 2.13 | 7.12 | 23.40  | 0.98 | 0.26  | 124                           |

**Table S8:** BaP<sub>TEQ</sub> and BaP<sub>MEQ</sub> concentrations ( $\mu\text{g kg}^{-1}$ ) of PAHs in indoor and outdoor dust from rural communities around gas flaring points

|            |         | BaA  | Chry | BbF  | BkF  | BaP   | DahA  | IndP  | BaP <sub>TEQ</sub> | BaA  | Chry | BbF  | BkF  | BaP   | DahA  | IndP   | BaP <sub>MEQ</sub> |
|------------|---------|------|------|------|------|-------|-------|-------|--------------------|------|------|------|------|-------|-------|--------|--------------------|
| Emu-Ebendo | IN-D1   | 4.60 | 0.05 | 17.8 | 4.36 | 1010  | 1100  | 38.0  | <b>2180</b>        | 3.77 | 0.82 | 44.5 | 48   | 1010  | 319   | 118    | <b>1550</b>        |
|            | IN-D2   | 20.4 | 0.55 | 42.6 | 13.9 | 2080  | 2520  | 128   | <b>4810</b>        | 16.7 | 9.42 | 107  | 153  | 2080  | 731   | 396    | <b>3490</b>        |
|            | IN-D3   | 241  | 0.6  | 152  | 15.7 | 3560  | 1200  | 197   | <b>5350</b>        | 197  | 10.3 | 381  | 173  | 3560  | 342   | 612    | <b>5280</b>        |
|            | IN-D4   | 4.40 | 0.11 | 9.00 | 2.12 | 562   | 260   | 21.0  | <b>859</b>         | 3.61 | 1.8  | 22.5 | 23.3 | 562   | 75.4  | 65.1   | <b>754</b>         |
|            | IN-D5   | 0.56 | 0.01 | 1.60 | 1.56 | 266   | 656   | 16.0  | <b>942</b>         | 0.46 | 0.24 | 4.00 | 17.2 | 266   | 190   | 50.8   | <b>529</b>         |
|            | IN-D6   | 1.40 | 4.16 | 2660 | 414  | 554   | 83400 | 864   | <b>87900</b>       | 1.15 | 70.7 | 6650 | 4554 | 554   | 24200 | 2680   | <b>38700</b>       |
|            | IN-D7   | 0.80 | 0.50 | 0    | 0    | 6300  | 65500 | 1460  | <b>73200</b>       | 0.66 | 8.5  | 0    | 0    | 6300  | 19000 | 4530   | <b>29800</b>       |
|            | IN-D8   | 1.20 | 0.05 | 0    | 0    | 0     | 0     | 1030  | <b>1030</b>        | 0.98 | 0.92 | 0    | 0    | 0     | 0     | 3190   | <b>3200</b>        |
|            | IN-D9   | 0.07 | 0.03 | 4.6  | 0.26 | 214   | 276   | 10.0  | <b>505</b>         | 0.06 | 0.54 | 11.5 | 2.86 | 214   | 80    | 31     | <b>340</b>         |
|            | IN-D10  | 0.06 | 0.01 | 2.08 | 0.38 | 110   | 146   | 10.2  | <b>269</b>         | 0.05 | 0.17 | 5.2  | 4.16 | 110   | 42.3  | 31.6   | <b>194</b>         |
| Otu-Jeremi | IN-D1   | 0    | 0    | 0    | 0    | 0     | 0     | 40500 | <b>40500</b>       | 0    | 0    | 0    | 0    | 0     | 0     | 126000 | <b>126000</b>      |
|            | IN-D2   | 2.9  | 0.19 | 38.2 | 44.1 | 0     | 0     | 0     | <b>85.0</b>        | 2.38 | 3.26 | 95.5 | 485  | 0     | 0     | 0      | <b>586</b>         |
|            | IN-D3   | 0.18 | 0    | 0    | 54.0 | 0     | 0     | 0     | <b>54.0</b>        | 0.15 | 0    | 0    | 594  | 0     | 0     | 0      | <b>594</b>         |
|            | IN-D4   | 0.26 | 0.02 | 153  | 0    | 0     | 35800 | 478   | <b>36400</b>       | 0.22 | 0.26 | 382  | 0    | 0     | 10400 | 1480   | <b>12200</b>       |
|            | IN-D5   | 0.1  | 0    | 0    | 0    | 0     | 0     | 626   | <b>626</b>         | 0.08 | 0    | 0    | 0    | 0     | 0     | 1940   | <b>1940</b>        |
|            | IN-D6   | 0    | 0.03 | 256  | 0    | 0     | 24682 | 915   | <b>25900</b>       | 0    | 0.48 | 640  | 0    | 0     | 7160  | 2840   | <b>10600</b>       |
|            | IN-D7   | 0.29 | 0    | 170  | 0    | 0     | 20200 | 1750  | <b>22100</b>       | 0.23 | 0.03 | 424  | 0    | 0     | 5850  | 5430   | <b>11700</b>       |
|            | IN-D8   | 0.13 | 0    | 148  | 0    | 0     | 25800 | 255   | <b>26200</b>       | 0.11 | 0    | 369  | 0    | 0     | 7490  | 791    | <b>8650</b>        |
|            | IN-D9   | 19.4 | 0    | 35.6 | 24.9 | 14400 | 10700 | 215   | <b>25400</b>       | 15.9 | 0    | 89   | 274  | 14400 | 3100  | 666    | <b>18500</b>       |
|            | IN-D10  | 1.82 | 0    | 74.7 | 40.6 | 0     | 23200 | 966   | <b>24300</b>       | 1.49 | 0    | 187  | 446  | 0     | 6720  | 3000   | <b>10400</b>       |
| Ebedei     | IN-D1   | 242  | 2.86 | 155  | 440  | 9670  | 1420  | 413   | <b>12000</b>       | 198  | 48.6 | 387  | 484  | 9670  | 411   | 1280   | <b>12500</b>       |
|            | IN-D2   | 167  | 2.63 | 127  | 51.3 | 10300 | 10700 | 80.5  | <b>21400</b>       | 137  | 44.8 | 316  | 565  | 10300 | 3109  | 249    | <b>14700</b>       |
|            | IN-D3   | 40.5 | 0    | 2.00 | 0.44 | 623   | 399   | 0.06  | <b>1070</b>        | 33.2 | 0.06 | 4.99 | 4.82 | 623   | 116   | 0.18   | <b>782</b>         |
|            | IN-D4   | 82.1 | 0.01 | 1.00 | 0.20 | 515   | 257   | 3.47  | <b>859</b>         | 67.3 | 0.1  | 2.5  | 2.21 | 515   | 74.6  | 10.8   | <b>673</b>         |
|            | IN-D5   | 0.52 | 0.01 | 3.53 | 1.01 | 1700  | 520   | 39.5  | <b>2260</b>        | 0.43 | 0.1  | 8.84 | 11.1 | 1700  | 151   | 122    | <b>1990</b>        |
|            | IN-D6   | 13.5 | 0    | 0.46 | 0.19 | 719   | 137   | 23.1  | <b>893</b>         | 11.1 | 0.03 | 1.16 | 2.13 | 719   | 39.6  | 71.7   | <b>844</b>         |
|            | IN-D7   | 0.24 | 0.01 | 6.69 | 8.21 | 769   | 412   | 14.5  | <b>1200</b>        | 0.2  | 0.1  | 16.7 | 90.3 | 769   | 120   | 44.9   | <b>1040</b>        |
|            | IN-D8   | 0.23 | 0.01 | 5.98 | 0.33 | 1750  | 266   | 13.7  | <b>2040</b>        | 0.19 | 0.21 | 15   | 3.59 | 1752  | 77    | 42.5   | <b>1890</b>        |
|            | IN-D9   | 0.6  | 0.02 | 1.14 | 3.69 | 862   | 1060  | 28.4  | <b>1960</b>        | 0.49 | 0.3  | 2.85 | 40.6 | 862   | 308   | 88.2   | <b>1300</b>        |
|            | IN-D10  | 190  | 1.73 | 302  | 21   | 3159  | 4039  | 289   | <b>8000</b>        | 155  | 29.4 | 755  | 231  | 3160  | 1170  | 897    | <b>6400</b>        |
| Emu-Ebendo | OUT-D1  | 0.18 | 0    | 2.44 | 0.56 | 124   | 290   | 12.6  | <b>430</b>         | 0.15 | 0.04 | 6.1  | 6.16 | 124   | 84.1  | 39.1   | <b>260</b>         |
|            | OUT-D2  | 58.7 | 0.42 | 47.5 | 4.54 | 1210  | 102   | 0.07  | <b>1430</b>        | 48.1 | 7.14 | 119  | 49.9 | 1210  | 29.5  | 0.2    | <b>1470</b>        |
|            | OUT-D3  | 0.2  | 0    | 1.00 | 3.04 | 178   | 104   | 9.6   | <b>296</b>         | 0.16 | 0.07 | 2.5  | 33.4 | 178   | 30.2  | 29.8   | <b>274</b>         |
|            | OUT-D4  | 0.17 | 0    | 1.36 | 1.08 | 136   | 80    | 5.6   | <b>224</b>         | 0.14 | 0.03 | 3.4  | 11.9 | 136   | 23.2  | 17.4   | <b>192</b>         |
|            | OUT-D5  | 0.12 | 0.01 | 1.60 | 1.11 | 112   | 66    | 3.4   | <b>184</b>         | 0.10 | 0.13 | 4    | 12.3 | 112   | 19.1  | 10.5   | <b>158</b>         |
|            | OUT-D6  | 220  | 0.06 | 8.49 | 0.29 | 38.1  | 175   | 5.24  | <b>448</b>         | 181  | 0.98 | 21.2 | 3.24 | 38.1  | 50.8  | 16.3   | <b>311</b>         |
|            | OUT-D7  | 0.36 | 0    | 0.80 | 0.25 | 70.0  | 20.0  | 11.8  | <b>103</b>         | 0.30 | 0.04 | 2    | 2.71 | 70    | 58.0  | 36.5   | <b>117</b>         |
|            | OUT-D8  | 0.24 | 0.01 | 1.68 | 0.67 | 266   | 138   | 11.0  | <b>417</b>         | 0.20 | 0.25 | 4.2  | 7.41 | 266   | 40    | 34.1   | <b>352</b>         |
|            | OUT-D9  | 0.13 | 0.01 | 2.45 | 0.41 | 61.5  | 233   | 9.46  | <b>307</b>         | 0.11 | 0.13 | 6.13 | 4.56 | 61.5  | 67.5  | 29.3   | <b>169</b>         |
|            | OUT-D10 | 0.23 | 0.01 | 2.01 | 0.81 | 83.4  | 99.3  | 12.2  | <b>198</b>         | 0.19 | 0.11 | 5.03 | 8.86 | 83.4  | 28.8  | 37.7   | <b>164</b>         |
| Otu-Jeremi | OUT-D1  | 0    | 0.31 | 335  | 90.9 | 3250  | 10800 | 695   | <b>15200</b>       | 0    | 5.34 | 837  | 1000 | 3250  | 3130  | 2160   | <b>10400</b>       |
|            | OUT-D2  | 0.11 | 0.04 | 294  | 0    | 15900 | 0     | 0     | <b>16200</b>       | 0.09 | 0.69 | 735  | 0    | 15900 | 0     | 0      | <b>16700</b>       |
|            | OUT-D3  | 0.12 | 0    | 48   | 0    | 0     | 0     | 6230  | <b>6280</b>        | 0.1  | 0.06 | 120  | 0    | 0     | 0     | 19300  | <b>19400</b>       |
|            | OUT-D4  | 21.3 | 0    | 628  | 0    | 0     | 0     | 0     | <b>650</b>         | 17.5 | 0    | 1570 | 0    | 0     | 0     | 0      | <b>1590</b>        |
|            | OUT-D5  | 2.65 | 0    | 0    | 0    | 0     | 73500 | 0     | <b>73500</b>       | 2.17 | 0    | 0    | 0    | 0     | 21300 | 0      | <b>21300</b>       |
|            | OUT-D6  | 1.3  | 0.14 | 90.6 | 0    | 0     | 52800 | 583   | <b>53500</b>       | 1.07 | 2.33 | 227  | 0    | 0     | 15300 | 1810   | <b>17300</b>       |
|            | OUT-D7  | 0.23 | 0.03 | 0    | 128  | 0     | 38700 | 0     | <b>38800</b>       | 0.19 | 0.49 | 0    | 1410 | 0     | 11200 | 0      | <b>12600</b>       |
|            | OUT-D8  | 0.4  | 0    | 0    | 0    | 0     | 0     | 6540  | <b>6540</b>        | 0.33 | 0    | 0    | 0    | 0     | 0     | 20300  | <b>20300</b>       |
|            | OUT-D9  | 103  | 0.52 | 76.6 | 12.3 | 2000  | 2470  | 171   | <b>4820</b>        | 84.5 | 8.79 | 192  | 135  | 2000  | 715   | 530    | <b>3660</b>        |
|            | OUT-D10 | 0.62 | 0.63 | 21.8 | 10.5 | 12100 | 12100 | 62.2  | <b>24300</b>       | 0.51 | 10.7 | 54.5 | 116  | 12100 | 3510  | 193    | <b>16000</b>       |
| Ebedei     | OUT-D1  | 155  | 0.01 | 0.77 | 0.12 | 76.3  | 80.8  | 1.08  | <b>314</b>         | 127  | 0.15 | 1.92 | 1.28 | 76.3  | 23.4  | 3.34   | <b>233</b>         |
|            | OUT-D2  | 2.71 | 0.03 | 9.15 | 5.78 | 2570  | 223   | 27.5  | <b>2830</b>        | 2.22 | 0.57 | 22.9 | 63.6 | 2570  | 64.6  | 85.2   | <b>2800</b>        |
|            | OUT-D3  | 0.43 | 0.01 | 13.3 | 4.3  | 2730  | 428   | 8.49  | <b>3190</b>        | 0.35 | 0.13 | 33.2 | 47.3 | 2730  | 124   | 26.3   | <b>2960</b>        |
|            | OUT-D4  | 1.17 | 0.01 | 338  | 0.05 | 362   | 125   | 3.99  | <b>831</b>         | 0.96 | 0.09 | 846  | 0.59 | 362   | 36.3  | 12.4   | <b>1260</b>        |
|            | OUT-D5  | 1.23 | 0.02 | 181  | 3.07 | 1960  | 248   | 27.8  | <b>2430</b>        | 1.01 | 0.26 | 452  | 33.7 | 1960  | 71.8  | 86.3   | <b>2610</b>        |
|            | OUT-D6  | 0.2  | 0.03 | 36.7 | 1.5  | 1660  | 735   | 13.6  | <b>2450</b>        | 0.16 | 0.45 | 91.8 | 16.5 | 1660  | 213   | 42.1   | <b>2030</b>        |
|            | OUT-D7  | 209  | 1.71 | 224  | 0.58 | 136   | 3760  | 247   | <b>4580</b>        | 172  | 29.1 | 560  | 6.36 | 136   | 1090  | 764    | <b>2760</b>        |
|            | OUT-D8  | 1.06 | 0.01 | 4.13 | 2.2  | 582   | 571   | 19.1  | <b>1180</b>        | 0.87 | 0.22 | 10.3 | 24.3 | 582   | 166   | 59.3   | <b>842</b>         |
|            | OUT-D9  | 157  | 1.77 | 208  | 92.5 | 3800  | 5810  | 208   | <b>10300</b>       | 129  | 30   | 520  | 1020 | 3800  | 1680  | 645    | <b>7820</b>        |
|            | OUT-D10 | 122  | 8.34 | 1450 | 51.2 | 1850  | 6100  | 580   | <b>10200</b>       | 100  | 142  | 3610 | 563  | 1850  | 1770  | 1800   | <b>9830</b>        |



**Table S9:** Hazard index of PAHs in indoor and outdoor dust from rural communities around gas flaring points

|       |         | Emu-Ebendo              |                         |                         |                         | Otu-Jeremi              |                         |                         |                         | Ebedei                  |                         |                         |                         |
|-------|---------|-------------------------|-------------------------|-------------------------|-------------------------|-------------------------|-------------------------|-------------------------|-------------------------|-------------------------|-------------------------|-------------------------|-------------------------|
|       |         | HQ <sub>ing</sub>       | HQ <sub>inh</sub>       | HQ <sub>dermal</sub>    | HI                      | HQ <sub>ing</sub>       | HQ <sub>inh</sub>       | HQ <sub>dermal</sub>    | HI                      | HQ <sub>ing</sub>       | HQ <sub>inh</sub>       | HQ <sub>dermal</sub>    | HI                      |
| Child | IN-D1   | 7.49 × 10 <sup>-1</sup> | 1.95 × 10 <sup>-3</sup> | 2.70 × 10 <sup>-1</sup> | 1.02                    | 1.55 × 10 <sup>-2</sup> | 2.56 × 10 <sup>-5</sup> | 5.63 × 10 <sup>-3</sup> | 2.11 × 10 <sup>-2</sup> | 1.02 × 10 <sup>-1</sup> | 1.94 × 10 <sup>-4</sup> | 3.70 × 10 <sup>-2</sup> | 1.39 × 10 <sup>-1</sup> |
|       | IN-D2   | 4.80                    | 1.89 × 10 <sup>-2</sup> | 1.70                    | 6.57                    | 6.66 × 10 <sup>-3</sup> | 2.85 × 10 <sup>-5</sup> | 2.42 × 10 <sup>-3</sup> | 9.12 × 10 <sup>-3</sup> | 7.26 × 10 <sup>-2</sup> | 1.27 × 10 <sup>-4</sup> | 2.64 × 10 <sup>-2</sup> | 9.91 × 10 <sup>-2</sup> |
|       | IN-D3   | 3.44 × 10 <sup>1</sup>  | 1.05 × 10 <sup>-1</sup> | 1.30 × 10 <sup>1</sup>  | 4.70 × 10 <sup>1</sup>  | 5.47 × 10 <sup>-2</sup> | 3.83 × 10 <sup>-4</sup> | 1.99 × 10 <sup>-2</sup> | 7.50 × 10 <sup>-2</sup> | 2.40                    | 8.51 × 10 <sup>-3</sup> | 8.86 × 10 <sup>-1</sup> | 3.33                    |
|       | IN-D4   | 4.39 × 10 <sup>-1</sup> | 1.11 × 10 <sup>-3</sup> | 1.60 × 10 <sup>-1</sup> | 6.01 × 10 <sup>-1</sup> | 4.37 × 10 <sup>-2</sup> | 1.10 × 10 <sup>-3</sup> | 1.59 × 10 <sup>-2</sup> | 6.08 × 10 <sup>-2</sup> | 2.00                    | 4.74 × 10 <sup>-3</sup> | 7.46 × 10 <sup>-1</sup> | 2.80                    |
|       | IN-D5   | 2.96 × 10 <sup>-3</sup> | 5.21 × 10 <sup>-5</sup> | 1.08 × 10 <sup>-3</sup> | 4.09 × 10 <sup>-3</sup> | 1.03 × 10 <sup>-2</sup> | 6.38 × 10 <sup>-5</sup> | 3.75 × 10 <sup>-3</sup> | 1.41 × 10 <sup>-2</sup> | 4.59 × 10 <sup>-3</sup> | 5.48 × 10 <sup>-5</sup> | 1.67 × 10 <sup>-3</sup> | 6.32 × 10 <sup>-3</sup> |
|       | IN-D6   | 5.41 × 10 <sup>-3</sup> | 8.95 × 10 <sup>-6</sup> | 1.97 × 10 <sup>-3</sup> | 7.39 × 10 <sup>-3</sup> | 9.37 × 10 <sup>-3</sup> | 5.57 × 10 <sup>-5</sup> | 3.41 × 10 <sup>-3</sup> | 1.28 × 10 <sup>-2</sup> | 1.20                    | 2.05 × 10 <sup>-3</sup> | 4.51 × 10 <sup>-1</sup> | 1.69                    |
|       | IN-D7   | 7.20 × 10 <sup>-3</sup> | 1.19 × 10 <sup>-5</sup> | 2.62 × 10 <sup>-3</sup> | 9.84 × 10 <sup>-3</sup> | 1.42 × 10 <sup>-2</sup> | 1.07 × 10 <sup>-4</sup> | 5.18 × 10 <sup>-3</sup> | 1.95 × 10 <sup>-2</sup> | 2.45 × 10 <sup>-3</sup> | 1.63 × 10 <sup>-5</sup> | 8.92 × 10 <sup>-4</sup> | 3.36 × 10 <sup>-3</sup> |
|       | IN-D8   | 1.16 × 10 <sup>-2</sup> | 1.92 × 10 <sup>-5</sup> | 4.22 × 10 <sup>-3</sup> | 1.58 × 10 <sup>-2</sup> | 1.42 × 10 <sup>-2</sup> | 1.57 × 10 <sup>-4</sup> | 5.16 × 10 <sup>-3</sup> | 1.95 × 10 <sup>-2</sup> | 8.18 × 10 <sup>-3</sup> | 5.04 × 10 <sup>-5</sup> | 2.98 × 10 <sup>-3</sup> | 1.12 × 10 <sup>-2</sup> |
|       | IN-D9   | 1.87 × 10 <sup>-3</sup> | 8.77 × 10 <sup>-6</sup> | 6.81 × 10 <sup>-4</sup> | 2.56 × 10 <sup>-3</sup> | 1.25 × 10 <sup>-2</sup> | 2.06 × 10 <sup>-5</sup> | 4.53 × 10 <sup>-3</sup> | 1.70 × 10 <sup>-2</sup> | 2.91 × 10 <sup>-2</sup> | 5.48 × 10 <sup>-5</sup> | 1.06 × 10 <sup>-2</sup> | 3.98 × 10 <sup>-2</sup> |
|       | IN-D10  | 1.48 × 10 <sup>-3</sup> | 1.09 × 10 <sup>-5</sup> | 5.38 × 10 <sup>-4</sup> | 2.03 × 10 <sup>-3</sup> | 1.05 × 10 <sup>-2</sup> | 1.80 × 10 <sup>-4</sup> | 3.84 × 10 <sup>-3</sup> | 1.46 × 10 <sup>-2</sup> | 2.67 × 10 <sup>-1</sup> | 5.18 × 10 <sup>-4</sup> | 9.73 × 10 <sup>-2</sup> | 3.65 × 10 <sup>-1</sup> |
| Adult | IN-D1   | 7.49 × 10 <sup>-1</sup> | 1.95 × 10 <sup>-3</sup> | 2.73 × 10 <sup>-1</sup> | 1.02                    | 1.45 × 10 <sup>-3</sup> | 5.12 × 10 <sup>-5</sup> | 4.30 × 10 <sup>-3</sup> | 5.80 × 10 <sup>-3</sup> | 9.53 × 10 <sup>-3</sup> | 3.87 × 10 <sup>-4</sup> | 1.42 × 10 <sup>-2</sup> | 2.41 × 10 <sup>-2</sup> |
|       | IN-D2   | 4.80                    | 1.89 × 10 <sup>-2</sup> | 1.70                    | 6.57                    | 6.25 × 10 <sup>-4</sup> | 5.70 × 10 <sup>-5</sup> | 9.79 × 10 <sup>-4</sup> | 1.66 × 10 <sup>-3</sup> | 6.80 × 10 <sup>-3</sup> | 2.53 × 10 <sup>-4</sup> | 1.40 × 10 <sup>-2</sup> | 2.10 × 10 <sup>-2</sup> |
|       | IN-D3   | 3.44 × 10 <sup>1</sup>  | 1.05 × 10 <sup>-1</sup> | 1.30 × 10 <sup>1</sup>  | 4.70 × 10 <sup>1</sup>  | 5.13 × 10 <sup>-3</sup> | 7.67 × 10 <sup>-4</sup> | 9.66 × 10 <sup>-3</sup> | 1.56 × 10 <sup>-2</sup> | 2.28 × 10 <sup>-1</sup> | 1.70 × 10 <sup>-2</sup> | 7.22 × 10 <sup>-1</sup> | 9.68 × 10 <sup>-1</sup> |
|       | IN-D4   | 4.39 × 10 <sup>-1</sup> | 1.11 × 10 <sup>-3</sup> | 1.60 × 10 <sup>-1</sup> | 6.01 × 10 <sup>-1</sup> | 4.10 × 10 <sup>-3</sup> | 2.21 × 10 <sup>-3</sup> | 7.26 × 10 <sup>-3</sup> | 1.36 × 10 <sup>-2</sup> | 1.92 × 10 <sup>-1</sup> | 9.47 × 10 <sup>-3</sup> | 4.84 × 10 <sup>-1</sup> | 6.86 × 10 <sup>-1</sup> |
|       | IN-D5   | 2.96 × 10 <sup>-3</sup> | 5.21 × 10 <sup>-5</sup> | 1.08 × 10 <sup>-3</sup> | 4.09 × 10 <sup>-3</sup> | 9.65 × 10 <sup>-4</sup> | 1.28 × 10 <sup>-4</sup> | 2.41 × 10 <sup>-3</sup> | 3.50 × 10 <sup>-3</sup> | 4.30 × 10 <sup>-4</sup> | 1.10 × 10 <sup>-4</sup> | 8.23 × 10 <sup>-4</sup> | 1.36 × 10 <sup>-3</sup> |
|       | IN-D6   | 5.41 × 10 <sup>-3</sup> | 8.95 × 10 <sup>-6</sup> | 1.97 × 10 <sup>-3</sup> | 7.39 × 10 <sup>-3</sup> | 8.78 × 10 <sup>-4</sup> | 1.11 × 10 <sup>-4</sup> | 2.99 × 10 <sup>-3</sup> | 3.98 × 10 <sup>-3</sup> | 1.16 × 10 <sup>-1</sup> | 4.10 × 10 <sup>-3</sup> | 4.08 × 10 <sup>-1</sup> | 5.28 × 10 <sup>-1</sup> |
|       | IN-D7   | 7.20 × 10 <sup>-3</sup> | 1.19 × 10 <sup>-5</sup> | 2.62 × 10 <sup>-3</sup> | 9.84 × 10 <sup>-3</sup> | 1.33 × 10 <sup>-3</sup> | 2.14 × 10 <sup>-4</sup> | 3.00 × 10 <sup>-3</sup> | 4.55 × 10 <sup>-3</sup> | 2.30 × 10 <sup>-4</sup> | 3.27 × 10 <sup>-5</sup> | 6.28 × 10 <sup>-4</sup> | 8.90 × 10 <sup>-4</sup> |
|       | IN-D8   | 1.16 × 10 <sup>-2</sup> | 1.92 × 10 <sup>-5</sup> | 4.22 × 10 <sup>-3</sup> | 1.58 × 10 <sup>-2</sup> | 1.33 × 10 <sup>-3</sup> | 3.13 × 10 <sup>-4</sup> | 3.41 × 10 <sup>-3</sup> | 5.05 × 10 <sup>-3</sup> | 7.67 × 10 <sup>-4</sup> | 1.01 × 10 <sup>-4</sup> | 1.45 × 10 <sup>-3</sup> | 2.31 × 10 <sup>-3</sup> |
|       | IN-D9   | 1.87 × 10 <sup>-3</sup> | 8.77 × 10 <sup>-6</sup> | 6.81 × 10 <sup>-4</sup> | 2.56 × 10 <sup>-3</sup> | 1.17 × 10 <sup>-3</sup> | 4.12 × 10 <sup>-5</sup> | 4.57 × 10 <sup>-3</sup> | 5.78 × 10 <sup>-3</sup> | 2.73 × 10 <sup>-3</sup> | 1.10 × 10 <sup>-4</sup> | 4.15 × 10 <sup>-3</sup> | 6.99 × 10 <sup>-3</sup> |
|       | IN-D10  | 1.48 × 10 <sup>-3</sup> | 1.09 × 10 <sup>-5</sup> | 5.38 × 10 <sup>-4</sup> | 2.03 × 10 <sup>-3</sup> | 9.88 × 10 <sup>-4</sup> | 3.60 × 10 <sup>-4</sup> | 1.85 × 10 <sup>-3</sup> | 3.20 × 10 <sup>-3</sup> | 2.51 × 10 <sup>-2</sup> | 1.04 × 10 <sup>-3</sup> | 4.54 × 10 <sup>-2</sup> | 7.15 × 10 <sup>-2</sup> |
| Child | OUT-D1  | 1.88 × 10 <sup>-2</sup> | 3.11 × 10 <sup>-5</sup> | 6.84 × 10 <sup>-3</sup> | 2.57 × 10 <sup>-2</sup> | 1.81 × 10 <sup>-2</sup> | 1.44 × 10 <sup>-4</sup> | 6.60 × 10 <sup>-3</sup> | 2.49 × 10 <sup>-2</sup> | 5.20                    | 1.92 × 10 <sup>-2</sup> | 1.89                    | 7.09                    |
|       | OUT-D2  | 3.84                    | 4.20 × 10 <sup>-2</sup> | 1.40                    | 5.28                    | 1.02 × 10 <sup>-2</sup> | 1.46 × 10 <sup>-4</sup> | 3.72 × 10 <sup>-3</sup> | 1.41 × 10 <sup>-2</sup> | 5.06 × 10 <sup>-3</sup> | 8.37 × 10 <sup>-6</sup> | 1.84 × 10 <sup>-3</sup> | 6.91 × 10 <sup>-3</sup> |
|       | OUT-D3  | 1.61 × 10 <sup>-3</sup> | 2.16 × 10 <sup>-5</sup> | 5.86 × 10 <sup>-4</sup> | 2.22 × 10 <sup>-3</sup> | 3.14 × 10 <sup>-2</sup> | 7.21 × 10 <sup>-4</sup> | 1.14 × 10 <sup>-2</sup> | 4.36 × 10 <sup>-2</sup> | 3.75 × 10 <sup>-3</sup> | 6.29 × 10 <sup>-5</sup> | 1.36 × 10 <sup>-3</sup> | 5.18 × 10 <sup>-3</sup> |
|       | OUT-D4  | 1.24 × 10 <sup>-3</sup> | 1.81 × 10 <sup>-5</sup> | 4.50 × 10 <sup>-4</sup> | 1.71 × 10 <sup>-3</sup> | 8.37 × 10 <sup>-3</sup> | 2.90 × 10 <sup>-5</sup> | 3.05 × 10 <sup>-3</sup> | 1.14 × 10 <sup>-2</sup> | 4.70                    | 7.82 × 10 <sup>-3</sup> | 1.72                    | 6.45                    |
|       | OUT-D5  | 1.19 × 10 <sup>-3</sup> | 5.75 × 10 <sup>-6</sup> | 4.34 × 10 <sup>-4</sup> | 1.63 × 10 <sup>-3</sup> | 1.28 × 10 <sup>-2</sup> | 4.61 × 10 <sup>-5</sup> | 4.64 × 10 <sup>-3</sup> | 1.74 × 10 <sup>-2</sup> | 8.88 × 10 <sup>-3</sup> | 1.21 × 10 <sup>-4</sup> | 3.23 × 10 <sup>-3</sup> | 1.22 × 10 <sup>-2</sup> |
|       | OUT-D6  | 2.90 × 10 <sup>-3</sup> | 1.90 × 10 <sup>-5</sup> | 1.05 × 10 <sup>-3</sup> | 3.97 × 10 <sup>-3</sup> | 6.17 × 10 <sup>-3</sup> | 5.18 × 10 <sup>-5</sup> | 2.24 × 10 <sup>-3</sup> | 8.46 × 10 <sup>-3</sup> | 1.30 × 10 <sup>-2</sup> | 3.63 × 10 <sup>-4</sup> | 4.75 × 10 <sup>-3</sup> | 1.81 × 10 <sup>-2</sup> |
|       | OUT-D7  | 2.86 × 10 <sup>-3</sup> | 3.59 × 10 <sup>-5</sup> | 1.04 × 10 <sup>-3</sup> | 3.93 × 10 <sup>-3</sup> | 2.82 × 10 <sup>-2</sup> | 6.93 × 10 <sup>-5</sup> | 1.03 × 10 <sup>-2</sup> | 3.85 × 10 <sup>-2</sup> | 1.80                    | 3.04 × 10 <sup>-3</sup> | 6.56 × 10 <sup>-1</sup> | 2.46                    |
|       | OUT-D8  | 2.65 × 10 <sup>-3</sup> | 1.90 × 10 <sup>-5</sup> | 9.63 × 10 <sup>-4</sup> | 3.63 × 10 <sup>-3</sup> | 1.19 × 10 <sup>-2</sup> | 5.19 × 10 <sup>-5</sup> | 4.34 × 10 <sup>-3</sup> | 1.63 × 10 <sup>-2</sup> | 1.20 × 10 <sup>-2</sup> | 5.48 × 10 <sup>-5</sup> | 4.36 × 10 <sup>-3</sup> | 1.64 × 10 <sup>-2</sup> |
|       | OUT-D9  | 3.47 × 10 <sup>-3</sup> | 2.84 × 10 <sup>-5</sup> | 1.26 × 10 <sup>-3</sup> | 4.76 × 10 <sup>-3</sup> | 1.02                    | 2.38 × 10 <sup>-3</sup> | 3.70 × 10 <sup>-1</sup> | 1.39                    | 1.89 × 10 <sup>-1</sup> | 7.26 × 10 <sup>-4</sup> | 6.90 × 10 <sup>-2</sup> | 2.59 × 10 <sup>-1</sup> |
|       | OUT-D10 | 9.16 × 10 <sup>-4</sup> | 1.19 × 10 <sup>-5</sup> | 3.34 × 10 <sup>-4</sup> | 1.26 × 10 <sup>-3</sup> | 2.31 × 10 <sup>-1</sup> | 4.40 × 10 <sup>-4</sup> | 8.42 × 10 <sup>-2</sup> | 3.16 × 10 <sup>-1</sup> | 1.14 × 10 <sup>-1</sup> | 4.94 × 10 <sup>-4</sup> | 4.14 × 10 <sup>-2</sup> | 1.56 × 10 <sup>-1</sup> |
| Adult | OUT-D1  | 1.76 × 10 <sup>-3</sup> | 6.22 × 10 <sup>-5</sup> | 7.58 × 10 <sup>-3</sup> | 9.41 × 10 <sup>-3</sup> | 1.70 × 10 <sup>-3</sup> | 2.88 × 10 <sup>-4</sup> | 6.89 × 10 <sup>-3</sup> | 8.88 × 10 <sup>-3</sup> | 4.86 × 10 <sup>-1</sup> | 3.84 × 10 <sup>-2</sup> | 1.29                    | 1.82                    |
|       | OUT-D2  | 3.60 × 10 <sup>-1</sup> | 8.44 × 10 <sup>-2</sup> | 7.03 × 10 <sup>-1</sup> | 1.15                    | 9.59 × 10 <sup>-4</sup> | 2.92 × 10 <sup>-4</sup> | 2.50 × 10 <sup>-3</sup> | 3.75 × 10 <sup>-3</sup> | 4.74 × 10 <sup>-4</sup> | 1.67 × 10 <sup>-5</sup> | 8.56 × 10 <sup>-4</sup> | 1.35 × 10 <sup>-3</sup> |
|       | OUT-D3  | 1.51 × 10 <sup>-4</sup> | 4.31 × 10 <sup>-5</sup> | 3.30 × 10 <sup>-4</sup> | 5.25 × 10 <sup>-4</sup> | 2.95 × 10 <sup>-3</sup> | 1.44 × 10 <sup>-3</sup> | 5.26 × 10 <sup>-3</sup> | 9.65 × 10 <sup>-3</sup> | 3.52 × 10 <sup>-4</sup> | 1.26 × 10 <sup>-4</sup> | 6.52 × 10 <sup>-4</sup> | 1.13 × 10 <sup>-3</sup> |
|       | OUT-D4  | 1.16 × 10 <sup>-4</sup> | 3.62 × 10 <sup>-5</sup> | 2.50 × 10 <sup>-4</sup> | 4.02 × 10 <sup>-4</sup> | 7.85 × 10 <sup>-4</sup> | 5.79 × 10 <sup>-5</sup> | 2.79 × 10 <sup>-3</sup> | 3.64 × 10 <sup>-3</sup> | 4.43 × 10 <sup>-1</sup> | 1.56 × 10 <sup>-2</sup> | 1.63                    | 2.09                    |
|       | OUT-D5  | 1.12 × 10 <sup>-4</sup> | 1.15 × 10 <sup>-5</sup> | 2.62 × 10 <sup>-4</sup> | 3.85 × 10 <sup>-4</sup> | 1.20 × 10 <sup>-3</sup> | 9.23 × 10 <sup>-5</sup> | 4.49 × 10 <sup>-3</sup> | 5.78 × 10 <sup>-3</sup> | 8.33 × 10 <sup>-4</sup> | 2.43 × 10 <sup>-4</sup> | 1.35 × 10 <sup>-3</sup> | 2.43 × 10 <sup>-3</sup> |
|       | OUT-D6  | 2.72 × 10 <sup>-4</sup> | 3.79 × 10 <sup>-5</sup> | 6.69 × 10 <sup>-4</sup> | 9.79 × 10 <sup>-4</sup> | 5.78 × 10 <sup>-4</sup> | 1.04 × 10 <sup>-4</sup> | 1.22 × 10 <sup>-3</sup> | 1.90 × 10 <sup>-3</sup> | 1.22 × 10 <sup>-3</sup> | 7.26 × 10 <sup>-4</sup> | 1.94 × 10 <sup>-3</sup> | 3.88 × 10 <sup>-3</sup> |
|       | OUT-D7  | 2.68 × 10 <sup>-4</sup> | 7.18 × 10 <sup>-5</sup> | 8.59 × 10 <sup>-4</sup> | 1.20 × 10 <sup>-3</sup> | 2.64 × 10 <sup>-3</sup> | 1.39 × 10 <sup>-4</sup> | 4.85 × 10 <sup>-3</sup> | 7.63 × 10 <sup>-3</sup> | 1.69 × 10 <sup>-1</sup> | 6.08 × 10 <sup>-3</sup> | 5.69 × 10 <sup>-1</sup> | 7.44 × 10 <sup>-1</sup> |
|       | OUT-D8  | 2.48 × 10 <sup>-4</sup> | 3.80 × 10 <sup>-5</sup> | 4.28 × 10 <sup>-4</sup> | 7.14 × 10 <sup>-4</sup> | 1.12 × 10 <sup>-3</sup> | 1.04 × 10 <sup>-4</sup> | 4.77 × 10 <sup>-3</sup> | 5.99 × 10 <sup>-3</sup> | 1.12 × 10 <sup>-3</sup> | 1.10 × 10 <sup>-4</sup> | 5.53 × 10 <sup>-3</sup> | 6.77 × 10 <sup>-3</sup> |
|       | OUT-D9  | 3.26 × 10 <sup>-4</sup> | 5.68 × 10 <sup>-5</sup> | 7.10 × 10 <sup>-4</sup> | 1.09 × 10 <sup>-3</sup> | 9.52 × 10 <sup>-2</sup> | 4.77 × 10 <sup>-3</sup> | 4.00 × 10 <sup>-1</sup> | 5.00 × 10 <sup>-1</sup> | 1.78 × 10 <sup>-2</sup> | 1.45 × 10 <sup>-3</sup> | 2.92 × 10 <sup>-2</sup> | 4.84 × 10 <sup>-2</sup> |
|       | OUT-D10 | 8.59 × 10 <sup>-5</sup> | 2.38 × 10 <sup>-5</sup> | 2.34 × 10 <sup>-4</sup> | 3.44 × 10 <sup>-4</sup> | 2.17 × 10 <sup>-2</sup> | 8.80 × 10 <sup>-4</sup> | 4.58 × 10 <sup>-2</sup> | 6.83 × 10 <sup>-2</sup> | 1.07 × 10 <sup>-2</sup> | 9.89 × 10 <sup>-4</sup> | 3.17 × 10 <sup>-2</sup> | 4.34 × 10 <sup>-2</sup> |

**Table S10:** Total cancer risk of PAHs in indoor and outdoor dust from rural communities around gas flaring points

|       |         | Emu-Ebendo              |                     |                         |                         | Otu-Jeremi              |                         |                         |                         | Ebedei                  |                         |                         |                         |
|-------|---------|-------------------------|---------------------|-------------------------|-------------------------|-------------------------|-------------------------|-------------------------|-------------------------|-------------------------|-------------------------|-------------------------|-------------------------|
|       |         | Risk <sub>ing</sub>     | Risk <sub>inh</sub> | Risk <sub>dermal</sub>  | ILCR                    | Risk <sub>ing</sub>     | Risk <sub>inh</sub>     | Risk <sub>dermal</sub>  | ILCR                    | Risk <sub>ing</sub>     | Risk <sub>inh</sub>     | Risk <sub>dermal</sub>  | ILCR                    |
| Child | IN-D1   | 2.03 × 10 <sup>-1</sup> | 5.16E-08            | 7.20 × 10 <sup>-1</sup> | 9.24 × 10 <sup>-1</sup> | 3.78                    | 9.43 × 10 <sup>-7</sup> | 1.38                    | 5.16                    | 1.12                    | 2.88 × 10 <sup>-7</sup> | 3.80                    | 4.91                    |
|       | IN-D2   | 4.49 × 10 <sup>-1</sup> | 1.15E-07            | 1.57                    | 2.02                    | 7.97 × 10 <sup>-3</sup> | 1.13 × 10 <sup>-8</sup> | 2.90 × 10 <sup>-3</sup> | 1.09 × 10 <sup>-2</sup> | 2.00                    | 5.09 × 10 <sup>-7</sup> | 7.14                    | 9.13                    |
|       | IN-D3   | 5.02 × 10 <sup>-1</sup> | 1.29E-07            | 1.63                    | 2.13                    | 5.08 × 10 <sup>-3</sup> | 1.26 × 10 <sup>-8</sup> | 1.85 × 10 <sup>-3</sup> | 6.92 × 10 <sup>-3</sup> | 9.97 × 10 <sup>-2</sup> | 2.50 × 10 <sup>-8</sup> | 3.49 × 10 <sup>-1</sup> | 4.48 × 10 <sup>-1</sup> |
|       | IN-D4   | 8.02 × 10 <sup>-2</sup> | 2.05E-08            | 2.81 × 10 <sup>-1</sup> | 3.61 × 10 <sup>-1</sup> | 3.40                    | 8.47 × 10 <sup>-7</sup> | 1.22 × 10 <sup>1</sup>  | 1.56 × 10 <sup>1</sup>  | 8.03 × 10 <sup>-2</sup> | 2.01 × 10 <sup>-8</sup> | 2.65 × 10 <sup>-1</sup> | 3.46 × 10 <sup>-1</sup> |
|       | IN-D5   | 8.79 × 10 <sup>-2</sup> | 2.23E-08            | 3.14 × 10 <sup>-1</sup> | 4.02 × 10 <sup>-1</sup> | 5.84 × 10 <sup>-2</sup> | 1.46 × 10 <sup>-8</sup> | 2.13 × 10 <sup>-2</sup> | 7.97 × 10 <sup>-2</sup> | 2.11 × 10 <sup>-1</sup> | 5.29 × 10 <sup>-8</sup> | 7.56 × 10 <sup>-1</sup> | 9.67 × 10 <sup>-1</sup> |
|       | IN-D6   | 8.20                    | 2.13E-06            | 2.87 × 10 <sup>1</sup>  | 3.69 × 10 <sup>1</sup>  | 2.41                    | 6.02 × 10 <sup>-7</sup> | 8.43                    | 1.08 × 10 <sup>1</sup>  | 8.33 × 10 <sup>-2</sup> | 2.08 × 10 <sup>-8</sup> | 2.92 × 10 <sup>-1</sup> | 3.75 × 10 <sup>-1</sup> |
|       | IN-D7   | 6.84                    | 1.70E-06            | 2.44 × 10 <sup>1</sup>  | 3.13 × 10 <sup>1</sup>  | 2.06                    | 5.14 × 10 <sup>-7</sup> | 6.91                    | 8.97                    | 1.13 × 10 <sup>-1</sup> | 2.99 × 10 <sup>-8</sup> | 4.02 × 10 <sup>-1</sup> | 5.15 × 10 <sup>-1</sup> |
|       | IN-D8   | 9.63 × 10 <sup>-2</sup> | 2.40E-08            | 3.50 × 10 <sup>-2</sup> | 1.31 × 10 <sup>-1</sup> | 2.45                    | 6.10 × 10 <sup>-7</sup> | 8.79                    | 1.12 × 10 <sup>1</sup>  | 1.90 × 10 <sup>-1</sup> | 4.75 × 10 <sup>-8</sup> | 6.86 × 10 <sup>-1</sup> | 8.76 × 10 <sup>-1</sup> |
|       | IN-D9   | 4.71 × 10 <sup>-2</sup> | 1.18E-08            | 1.67 × 10 <sup>-1</sup> | 2.14 × 10 <sup>-1</sup> | 2.37                    | 5.95 × 10 <sup>-7</sup> | 8.53                    | 1.09 × 10 <sup>1</sup>  | 1.83 × 10 <sup>-1</sup> | 4.63 × 10 <sup>-8</sup> | 6.54 × 10 <sup>-1</sup> | 8.37 × 10 <sup>-1</sup> |
|       | IN-D10  | 2.51 × 10 <sup>-2</sup> | 6.33E-09            | 8.74 × 10 <sup>-2</sup> | 1.12 × 10 <sup>-1</sup> | 2.26                    | 5.73 × 10 <sup>-7</sup> | 7.91                    | 1.02 × 10 <sup>1</sup>  | 7.47 × 10 <sup>-1</sup> | 1.91 × 10 <sup>-7</sup> | 2.47                    | 3.22                    |
| Adult | IN-D1   | 1.86 × 10 <sup>-1</sup> | 1.03E-07            | 2.75 × 10 <sup>-1</sup> | 4.61 × 10 <sup>-1</sup> | 3.55 × 10 <sup>-1</sup> | 1.89 × 10 <sup>-6</sup> | 5.25 × 10 <sup>-1</sup> | 8.80 × 10 <sup>-1</sup> | 9.78 × 10 <sup>-1</sup> | 5.76 × 10 <sup>-7</sup> | 1.45                    | 2.43                    |
|       | IN-D2   | 4.04 × 10 <sup>-1</sup> | 2.30E-07            | 5.99 × 10 <sup>-1</sup> | 1.00                    | 7.47 × 10 <sup>-4</sup> | 2.25 × 10 <sup>-8</sup> | 1.11 × 10 <sup>-3</sup> | 1.85 × 10 <sup>-3</sup> | 1.84                    | 1.02 × 10 <sup>-6</sup> | 2.72                    | 4.56                    |
|       | IN-D3   | 4.20 × 10 <sup>-1</sup> | 2.58E-07            | 6.23 × 10 <sup>-1</sup> | 1.04                    | 4.74 × 10 <sup>-4</sup> | 2.52 × 10 <sup>-8</sup> | 7.05 × 10 <sup>-4</sup> | 1.18 × 10 <sup>-3</sup> | 8.98 × 10 <sup>-2</sup> | 5.00 × 10 <sup>-8</sup> | 1.33 × 10 <sup>-1</sup> | 2.23 × 10 <sup>-1</sup> |
|       | IN-D4   | 7.22 × 10 <sup>-2</sup> | 4.09E-08            | 1.07 × 10 <sup>-1</sup> | 1.79 × 10 <sup>-1</sup> | 3.14                    | 1.69 × 10 <sup>-6</sup> | 4.65                    | 7.78                    | 6.84 × 10 <sup>-2</sup> | 4.02 × 10 <sup>-8</sup> | 1.01 × 10 <sup>-1</sup> | 1.70 × 10 <sup>-1</sup> |
|       | IN-D5   | 8.09 × 10 <sup>-2</sup> | 4.45E-08            | 1.20 × 10 <sup>-1</sup> | 2.01 × 10 <sup>-1</sup> | 5.48 × 10 <sup>-3</sup> | 2.91 × 10 <sup>-8</sup> | 8.12 × 10 <sup>-3</sup> | 1.36 × 10 <sup>-2</sup> | 1.95 × 10 <sup>-1</sup> | 1.06 × 10 <sup>-7</sup> | 2.88 × 10 <sup>-1</sup> | 4.83 × 10 <sup>-1</sup> |
|       | IN-D6   | 7.38                    | 4.27E-06            | 1.09 × 10 <sup>1</sup>  | 1.83 × 10 <sup>1</sup>  | 2.17                    | 1.20 × 10 <sup>-6</sup> | 3.22                    | 5.39                    | 7.52 × 10 <sup>-2</sup> | 4.16 × 10 <sup>-8</sup> | 1.11 × 10 <sup>-1</sup> | 1.87 × 10 <sup>-1</sup> |
|       | IN-D7   | 6.29                    | 3.41E-06            | 9.33                    | 1.56 × 10 <sup>1</sup>  | 1.78                    | 1.03 × 10 <sup>-6</sup> | 2.64                    | 4.42                    | 1.04 × 10 <sup>-1</sup> | 5.98 × 10 <sup>-8</sup> | 1.54 × 10 <sup>-1</sup> | 2.57 × 10 <sup>-1</sup> |
|       | IN-D8   | 9.02 × 10 <sup>-3</sup> | 4.80E-08            | 1.34 × 10 <sup>-2</sup> | 2.24 × 10 <sup>-2</sup> | 2.26                    | 1.22 × 10 <sup>-6</sup> | 3.35                    | 5.62                    | 1.77 × 10 <sup>-1</sup> | 9.50 × 10 <sup>-8</sup> | 2.62 × 10 <sup>-1</sup> | 4.39 × 10 <sup>-1</sup> |
|       | IN-D9   | 4.30 × 10 <sup>-2</sup> | 2.36E-08            | 6.37 × 10 <sup>-2</sup> | 1.07 × 10 <sup>-1</sup> | 2.20                    | 1.19 × 10 <sup>-6</sup> | 3.26                    | 5.45                    | 1.68 × 10 <sup>-1</sup> | 9.26 × 10 <sup>-8</sup> | 2.50 × 10 <sup>-1</sup> | 4.18 × 10 <sup>-1</sup> |
|       | IN-D10  | 2.25 × 10 <sup>-2</sup> | 1.27E-08            | 3.34 × 10 <sup>-2</sup> | 5.59 × 10 <sup>-2</sup> | 2.04                    | 1.15 × 10 <sup>-6</sup> | 3.02                    | 5.05                    | 6.37 × 10 <sup>-1</sup> | 3.82 × 10 <sup>-7</sup> | 9.44 × 10 <sup>-1</sup> | 1.58                    |
| Child | OUT-D1  | 4.01 × 10 <sup>-2</sup> | 1.01E-08            | 1.41 × 10 <sup>-1</sup> | 1.81 × 10 <sup>-1</sup> | 1.42                    | 3.72 × 10 <sup>-7</sup> | 4.81                    | 6.22                    | 3.00 × 10 <sup>-2</sup> | 7.65 × 10 <sup>-9</sup> | 5.90 × 10 <sup>-2</sup> | 8.89 × 10 <sup>-2</sup> |
|       | OUT-D2  | 1.35 × 10 <sup>-1</sup> | 3.53E-08            | 4.51 × 10 <sup>-1</sup> | 5.86 × 10 <sup>-1</sup> | 1.51                    | 3.78 × 10 <sup>-7</sup> | 5.42                    | 6.94                    | 2.64 × 10 <sup>-1</sup> | 6.71 × 10 <sup>-8</sup> | 9.49 × 10 <sup>-1</sup> | 1.21                    |
|       | OUT-D3  | 2.76 × 10 <sup>-2</sup> | 7.52E-09            | 9.63 × 10 <sup>-2</sup> | 1.24 × 10 <sup>-1</sup> | 5.86 × 10 <sup>-1</sup> | 1.46 × 10 <sup>-7</sup> | 2.13 × 10 <sup>-1</sup> | 8.00 × 10 <sup>-1</sup> | 2.97 × 10 <sup>-1</sup> | 7.51 × 10 <sup>-8</sup> | 1.07                    | 1.37                    |
|       | OUT-D4  | 2.09 × 10 <sup>-2</sup> | 5.44E-09            | 7.37 × 10 <sup>-2</sup> | 9.46 × 10 <sup>-2</sup> | 6.06 × 10 <sup>-2</sup> | 1.51 × 10 <sup>-8</sup> | 2.21 × 10 <sup>-2</sup> | 8.27 × 10 <sup>-2</sup> | 7.75 × 10 <sup>-2</sup> | 1.93 × 10 <sup>-8</sup> | 1.77 × 10 <sup>-1</sup> | 2.55 × 10 <sup>-1</sup> |
|       | OUT-D5  | 1.72 × 10 <sup>-2</sup> | 4.52E-09            | 6.06 × 10 <sup>-2</sup> | 7.78 × 10 <sup>-2</sup> | 6.86                    | 1.71 × 10 <sup>-6</sup> | 2.50 × 10 <sup>1</sup>  | 3.18 × 10 <sup>1</sup>  | 2.26 × 10 <sup>-1</sup> | 5.71 × 10 <sup>-8</sup> | 7.59 × 10 <sup>-1</sup> | 9.85 × 10 <sup>-1</sup> |
|       | OUT-D6  | 4.18 × 10 <sup>-2</sup> | 1.05E-08            | 8.04 × 10 <sup>-2</sup> | 1.22 × 10 <sup>-1</sup> | 4.99                    | 1.24 × 10 <sup>-6</sup> | 1.80 × 10 <sup>1</sup>  | 2.29 × 10 <sup>1</sup>  | 2.29 × 10 <sup>-1</sup> | 5.73 × 10 <sup>-8</sup> | 8.16 × 10 <sup>-1</sup> | 1.04                    |
|       | OUT-D7  | 9.63 × 10 <sup>-3</sup> | 2.45E-09            | 3.10 × 10 <sup>-2</sup> | 4.07 × 10 <sup>-2</sup> | 3.62                    | 9.29 × 10 <sup>-7</sup> | 1.31 × 10 <sup>1</sup>  | 1.68 × 10 <sup>1</sup>  | 4.27 × 10 <sup>-1</sup> | 1.07 × 10 <sup>-7</sup> | 1.35                    | 1.77                    |
|       | OUT-D8  | 3.89 × 10 <sup>-2</sup> | 9.85E-09            | 1.38 × 10 <sup>-1</sup> | 1.77 × 10 <sup>-1</sup> | 6.10 × 10 <sup>-1</sup> | 1.52 × 10 <sup>-7</sup> | 2.22 × 10 <sup>-1</sup> | 8.32 × 10 <sup>-1</sup> | 1.10 × 10 <sup>-1</sup> | 2.79 × 10 <sup>-8</sup> | 3.93 × 10 <sup>-1</sup> | 5.03 × 10 <sup>-1</sup> |
|       | OUT-D9  | 2.86 × 10 <sup>-2</sup> | 7.23E-09            | 1.00 × 10 <sup>-1</sup> | 1.29 × 10 <sup>-1</sup> | 4.50 × 10 <sup>-1</sup> | 1.15 × 10 <sup>-7</sup> | 1.53                    | 1.98                    | 9.59 × 10 <sup>-1</sup> | 2.59 × 10 <sup>-7</sup> | 3.29                    | 4.24                    |
|       | OUT-D10 | 1.85 × 10 <sup>-2</sup> | 4.78E-09            | 6.26 × 10 <sup>-2</sup> | 8.11 × 10 <sup>-2</sup> | 2.27                    | 5.67 × 10 <sup>-7</sup> | 8.22                    | 1.05 × 10 <sup>1</sup>  | 9.47 × 10 <sup>-1</sup> | 2.49 × 10 <sup>-7</sup> | 2.77                    | 3.72                    |
| Adult | OUT-D1  | 3.64 × 10 <sup>-2</sup> | 2.02E-08            | 5.39 × 10 <sup>-2</sup> | 9.03 × 10 <sup>-2</sup> | 1.24                    | 7.44 × 10 <sup>-7</sup> | 1.84                    | 3.07                    | 1.52 × 10 <sup>-2</sup> | 1.53 × 10 <sup>-8</sup> | 2.25 × 10 <sup>-2</sup> | 3.77 × 10 <sup>-2</sup> |
|       | OUT-D2  | 1.16 × 10 <sup>-1</sup> | 7.06E-08            | 1.72 × 10 <sup>-1</sup> | 2.88 × 10 <sup>-1</sup> | 1.40                    | 7.55 × 10 <sup>-7</sup> | 2.07                    | 3.47                    | 2.44 × 10 <sup>-1</sup> | 1.34 × 10 <sup>-7</sup> | 3.62 × 10 <sup>-1</sup> | 6.06 × 10 <sup>-1</sup> |
|       | OUT-D3  | 2.48 × 10 <sup>-2</sup> | 1.50E-08            | 3.67 × 10 <sup>-2</sup> | 6.15 × 10 <sup>-2</sup> | 5.50 × 10 <sup>-2</sup> | 2.92 × 10 <sup>-7</sup> | 8.14 × 10 <sup>-2</sup> | 1.36 × 10 <sup>-1</sup> | 2.77 × 10 <sup>-1</sup> | 1.50 × 10 <sup>-7</sup> | 4.10 × 10 <sup>-1</sup> | 6.87 × 10 <sup>-1</sup> |
|       | OUT-D4  | 1.90 × 10 <sup>-2</sup> | 1.09E-08            | 2.81 × 10 <sup>-2</sup> | 4.71 × 10 <sup>-2</sup> | 5.68 × 10 <sup>-3</sup> | 3.02 × 10 <sup>-8</sup> | 8.43 × 10 <sup>-3</sup> | 1.41 × 10 <sup>-2</sup> | 4.57 × 10 <sup>-2</sup> | 3.87 × 10 <sup>-8</sup> | 6.77 × 10 <sup>-2</sup> | 1.13 × 10 <sup>-1</sup> |
|       | OUT-D5  | 1.56 × 10 <sup>-2</sup> | 9.03E-09            | 2.31 × 10 <sup>-2</sup> | 3.87 × 10 <sup>-2</sup> | 6.43                    | 3.42 × 10 <sup>-6</sup> | 9.53                    | 1.60 × 10 <sup>1</sup>  | 1.95 × 10 <sup>-1</sup> | 1.14 × 10 <sup>-7</sup> | 2.90 × 10 <sup>-1</sup> | 4.85 × 10 <sup>-1</sup> |
|       | OUT-D6  | 2.07 × 10 <sup>-2</sup> | 2.10E-08            | 3.07 × 10 <sup>-2</sup> | 5.14 × 10 <sup>-2</sup> | 4.62                    | 2.49 × 10 <sup>-6</sup> | 6.85                    | 1.15 × 10 <sup>1</sup>  | 2.10 × 10 <sup>-1</sup> | 1.15 × 10 <sup>-7</sup> | 3.11 × 10 <sup>-1</sup> | 5.21 × 10 <sup>-1</sup> |
|       | OUT-D7  | 7.99 × 10 <sup>-3</sup> | 4.91E-09            | 1.18 × 10 <sup>-2</sup> | 1.98 × 10 <sup>-2</sup> | 3.38                    | 1.86 × 10 <sup>-6</sup> | 5.01                    | 8.40                    | 3.47 × 10 <sup>-1</sup> | 2.14 × 10 <sup>-7</sup> | 5.14 × 10 <sup>-1</sup> | 8.61 × 10 <sup>-1</sup> |
|       | OUT-D8  | 3.54 × 10 <sup>-2</sup> | 1.97E-08            | 5.25 × 10 <sup>-2</sup> | 8.79 × 10 <sup>-2</sup> | 5.72 × 10 <sup>-2</sup> | 3.04 × 10 <sup>-7</sup> | 8.48 × 10 <sup>-2</sup> | 1.42 × 10 <sup>-1</sup> | 1.01 × 10 <sup>-1</sup> | 5.58 × 10 <sup>-8</sup> | 1.50 × 10 <sup>-1</sup> | 2.51 × 10 <sup>-1</sup> |
|       | OUT-D9  | 2.59 × 10 <sup>-2</sup> | 1.45E-08            | 3.83 × 10 <sup>-2</sup> | 6.42 × 10 <sup>-2</sup> | 3.94 × 10 <sup>-1</sup> | 2.30 × 10 <sup>-7</sup> | 5.83 × 10 <sup>-1</sup> | 9.77 × 10 <sup>-1</sup> | 8.46 × 10 <sup>-1</sup> | 5.18 × 10 <sup>-7</sup> | 1.25                    | 2.10                    |
|       | OUT-D10 | 1.61 × 10 <sup>-2</sup> | 9.55E-09            | 2.39 × 10 <sup>-2</sup> | 4.00 × 10 <sup>-2</sup> | 2.12                    | 1.13 × 10 <sup>-6</sup> | 3.14                    | 5.26                    | 7.14 × 10 <sup>-1</sup> | 4.97 × 10 <sup>-7</sup> | 1.06                    | 1.77                    |

**Table S11:** Isomeric ratios of PAHs in indoor and outdoor dust from rural communities around gas flaring points

|            |         | Ant/(Ant+Phen) | BaA/(BaA+Chry) | Flt/(Flt+Pyr) | IndP/(IndP+BghiP) | LMW/HMW | ΣCOMB/TPAH | PAH4/(5+6) | BaP/BghiP | Total index |
|------------|---------|----------------|----------------|---------------|-------------------|---------|------------|------------|-----------|-------------|
| Emu-Ebendo | IN-D1   | 0.74           | 0.49           | 0.89          | 0.19              | 1.02    | 0.39       | 0.03       | 0.63      | 12.4        |
|            | IN-D2   | 0.27           | 0.27           | 0.47          | 0.62              | 1.40    | 0.31       | 0.18       | 2.62      | 6.41        |
|            | IN-D3   | 0.56           | 0.80           | 0.72          | 0.55              | 4.56    | 0.17       | 1.34       | 2.21      | 12.5        |
|            | IN-D4   | 0.28           | 0.29           | 0.48          | 0.39              | 0.63    | 0.54       | 0.24       | 1.72      | 6.25        |
|            | IN-D5   | 0.23           | 0.29           | 0.88          | 0.73              | 0.00    | 0.51       | 0.02       | 4.43      | 7.35        |
|            | IN-D6   | 0.00           | 0.00           | 0.16          | 0.82              | 0.00    | 0.50       | 0.03       | 0.29      | 2.06        |
|            | IN-D7   | 0.00           | 0.02           | 0.11          | 0.82              | 0.00    | 0.27       | 0.01       | 2.01      | 2.00        |
|            | IN-D8   | 0.57           | 0.18           | 0.67          | 0.66              | 0.00    | 1.00       | 0.01       | 0.00      | 9.61        |
|            | IN-D9   | 0.84           | 0.02           | 0.35          | 0.60              | 0.02    | 0.50       | 0.05       | 3.15      | 10.6        |
|            | IN-D10  | 0.78           | 0.06           | 0.15          | 0.46              | 0.01    | 0.72       | 0.02       | 0.90      | 9.36        |
| Otu-Jeremi | IN-D1   | 0.22           | 0.00           | 0.00          | 0.98              | 0.00    | 1.00       | 0.00       | 0.00      | 4.19        |
|            | IN-D2   | 0.93           | 0.13           | 0.56          | 0.00              | 0.00    | 1.00       | 0.00       | 0.00      | 11.4        |
|            | IN-D3   | 0.10           | 0.00           | 0.31          | 0.00              | 0.00    | 1.00       | 0.00       | 0.00      | 1.75        |
|            | IN-D4   | 0.35           | 0.15           | 0.56          | 0.53              | 0.00    | 0.23       | 0.00       | 0.00      | 6.72        |
|            | IN-D5   | 0.34           | 0.00           | 0.60          | 0.96              | 0.00    | 0.99       | 0.00       | 0.00      | 6.81        |
|            | IN-D6   | 0.15           | 0.00           | 0.39          | 0.93              | 0.00    | 0.33       | 0.00       | 0.00      | 4.30        |
|            | IN-D7   | 0.14           | 0.61           | 0.49          | 0.91              | 0.00    | 0.51       | 0.00       | 0.00      | 7.51        |
|            | IN-D8   | 0.33           | 0.00           | 0.28          | 0.37              | 0.00    | 0.25       | 0.00       | 0.00      | 4.76        |
|            | IN-D9   | 0.32           | 0.00           | 0.15          | 0.11              | 0.00    | 0.78       | 0.00       | 0.85      | 3.85        |
|            | IN-D10  | 0.49           | 0.00           | 0.40          | 0.52              | 0.00    | 0.50       | 0.00       | 0.00      | 6.94        |
| Ebedei     | IN-D1   | 0.99           | 0.46           | 0.14          | 0.50              | 0.00    | 0.95       | 0.25       | 2.37      | 13.6        |
|            | IN-D2   | 0.56           | 0.39           | 0.06          | 0.17              | 0.00    | 0.71       | 0.16       | 2.55      | 8.04        |
|            | IN-D3   | 0.53           | 0.99           | 0.37          | 0.00              | 2.60    | 0.25       | 1.36       | 1.66      | 11.2        |
|            | IN-D4   | 0.67           | 0.99           | 0.14          | 0.08              | 2.27    | 0.29       | 2.13       | 1.21      | 12.2        |
|            | IN-D5   | 0.68           | 0.47           | 0.28          | 0.26              | 0.00    | 0.86       | 0.00       | 1.47      | 10.4        |
|            | IN-D6   | 0.53           | 0.99           | 0.86          | 0.63              | 0.00    | 0.25       | 0.42       | 5.27      | 13.7        |
|            | IN-D7   | 0.41           | 0.30           | 0.53          | 0.55              | 0.00    | 0.82       | 0.00       | 6.58      | 8.04        |
|            | IN-D8   | 0.93           | 0.15           | 0.72          | 0.34              | 0.02    | 0.88       | 0.01       | 6.65      | 12.6        |
|            | IN-D9   | 0.57           | 0.25           | 0.22          | 0.64              | 0.03    | 0.60       | 0.01       | 5.32      | 8.81        |
|            | IN-D10  | 0.64           | 0.52           | 0.23          | 0.84              | 0.01    | 0.81       | 0.37       | 5.80      | 11.3        |
| Emu-Ebendo | OUT-D1  | 0.85           | 0.41           | 0.68          | 0.67              | 0.27    | 0.46       | 0.01       | 2.00      | 13.6        |
|            | OUT-D2  | 0.69           | 0.58           | 0.23          | 0.07              | 1.44    | 0.40       | 2.58       | 132       | 10.5        |
|            | OUT-D3  | 0.73           | 0.33           | 0.80          | 0.57              | 0.01    | 0.86       | 0.01       | 2.47      | 12.1        |
|            | OUT-D4  | 0.67           | 0.51           | 0.62          | 0.33              | 0.01    | 0.84       | 0.01       | 1.21      | 11.5        |
|            | OUT-D5  | 0.69           | 0.13           | 0.75          | 0.25              | 0.21    | 0.85       | 0.02       | 1.08      | 9.93        |
|            | OUT-D6  | 0.53           | 0.97           | 0.80          | 0.27              | 0.00    | 0.93       | 4.38       | 0.28      | 12.7        |
|            | OUT-D7  | 0.17           | 0.60           | 0.48          | 0.56              | 0.02    | 0.59       | 0.02       | 0.76      | 7.04        |
|            | OUT-D8  | 0.89           | 0.14           | 0.59          | 0.64              | 0.01    | 0.79       | 0.03       | 4.37      | 12.4        |
|            | OUT-D9  | 0.32           | 0.15           | 0.35          | 0.48              | 0.02    | 0.58       | 0.02       | 0.60      | 5.77        |
|            | OUT-D10 | 0.21           | 0.26           | 0.18          | 0.68              | 0.00    | 0.79       | 0.02       | 1.44      | 5.23        |
| Otu-Jeremi | OUT-D1  | 0.62           | 0.00           | 0.05          | 0.83              | 0.00    | 0.69       | 0.01       | 2.35      | 8.00        |
|            | OUT-D2  | 0.41           | 0.03           | 0.40          | 0.00              | 0.00    | 1.00       | 0.00       | 0.31      | 5.22        |
|            | OUT-D3  | 0.63           | 0.26           | 0.61          | 0.81              | 0.00    | 1.00       | 0.00       | 0.00      | 10.75       |
|            | OUT-D4  | 0.56           | 0.00           | 0.29          | 0.00              | 0.00    | 1.00       | 0.00       | 0.00      | 6.36        |
|            | OUT-D5  | 0.56           | 0.00           | 0.17          | 0.00              | 0.00    | 0.07       | 0.00       | 0.00      | 6.03        |
|            | OUT-D6  | 0.36           | 0.09           | 0.38          | 0.10              | 0.00    | 0.53       | 0.00       | 0.00      | 5.21        |
|            | OUT-D7  | 0.25           | 0.07           | 0.49          | 0.00              | 0.00    | 0.35       | 0.00       | 0.00      | 4.13        |
|            | OUT-D8  | 0.44           | 0.00           | 0.66          | 0.50              | 0.00    | 0.99       | 0.00       | 0.00      | 7.11        |
|            | OUT-D9  | 0.47           | 0.67           | 0.49          | 0.69              | 0.26    | 0.63       | 0.33       | 2.63      | 10.67       |
|            | OUT-D10 | 0.25           | 0.01           | 1.00          | 0.07              | 0.01    | 0.65       | 1.38       | 0.03      | 5.16        |
| Ebedei     | OUT-D1  | 0.46           | 0.99           | 0.61          | 0.75              | 3.99    | 0.19       | 13.45      | 20.9      | 12.6        |
|            | OUT-D2  | 0.71           | 0.44           | 0.27          | 0.70              | 0.00    | 0.94       | 0.02       | 21.5      | 11.4        |
|            | OUT-D3  | 0.77           | 0.36           | 0.25          | 0.28              | 0.00    | 0.89       | 0.00       | 12.4      | 10.7        |
|            | OUT-D4  | 0.16           | 0.70           | 0.08          | 0.63              | 1.40    | 0.41       | 1.54       | 15.6      | 6.58        |
|            | OUT-D5  | 0.56           | 0.45           | 0.78          | 0.54              | 0.00    | 0.95       | 0.01       | 8.29      | 10.9        |
|            | OUT-D6  | 0.73           | 0.07           | 0.02          | 0.08              | 0.01    | 0.84       | 0.01       | 1.10      | 7.86        |
|            | OUT-D7  | 0.54           | 0.55           | 0.51          | 0.96              | 0.32    | 0.58       | 0.80       | 1.21      | 11.4        |
|            | OUT-D8  | 0.06           | 0.45           | 0.09          | 0.63              | 0.02    | 0.66       | 0.02       | 5.26      | 4.35        |
|            | OUT-D9  | 0.64           | 0.47           | 0.15          | 0.39              | 0.00    | 0.81       | 0.20       | 1.14      | 9.93        |
|            | OUT-D10 | 0.25           | 0.13           | 0.00          | 0.75              | 0.00    | 0.86       | 0.31       | 0.94      | 4.63        |

**Table S12:** PCA of PAHs in indoor dust from rural communities around gas flaring points

|         | Emu-Ebendo    |               |               | Otu-Jeremi    |               |               |               |               | Ebedei        |               |               |
|---------|---------------|---------------|---------------|---------------|---------------|---------------|---------------|---------------|---------------|---------------|---------------|
|         | Component     |               |               | Component     |               |               |               |               | Component     |               |               |
|         | 1             | 2             | 3             | 1             | 2             | 3             | 4             | 5             | 1             | 2             | 3             |
| Nap     | <b>.994</b>   | -.057         | -.008         | -.048         | -.046         | -.176         | .073          | <b>.965</b>   | <b>.845</b>   | -.107         | -.006         |
| Ace     | <b>.991</b>   | -.033         | .027          | -.231         | <b>.805</b>   | .079          | .408          | .331          | <b>.794</b>   | -.089         | -.030         |
| Acy     | <b>.989</b>   | -.031         | .029          | .482          | .325          | -.147         | .036          | <b>.786</b>   | <b>.957</b>   | -.204         | -.082         |
| Flu     | <b>.989</b>   | -.030         | .030          | -.275         | .577          | <b>.628</b>   | .365          | .199          | <b>.943</b>   | -.222         | -.091         |
| Phen    | <b>.891</b>   | -.106         | -.081         | .462          | .026          | .207          | <b>.796</b>   | .012          | <b>.934</b>   | -.209         | -.070         |
| Ant     | <b>.986</b>   | -.081         | -.026         | <b>.898</b>   | -.251         | .143          | -.124         | .187          | <b>.969</b>   | -.192         | -.056         |
| Flt     | <b>.993</b>   | -.036         | .021          | -.451         | -.056         | <b>.713</b>   | -.207         | -.338         | <b>.693</b>   | -.149         | .625          |
| Pyr     | <b>.998</b>   | -.036         | .022          | -.275         | <b>.893</b>   | -.239         | -.005         | -.178         | .500          | .308          | <b>.708</b>   |
| BaA     | <b>.997</b>   | -.040         | .014          | <b>.978</b>   | .043          | -.041         | .058          | -.011         | .004          | .688          | <b>.709</b>   |
| Chry    | .019          | <b>.994</b>   | .066          | .030          | .185          | .146          | -.898         | -.094         | -.213         | <b>.830</b>   | .506          |
| BbF     | -.046         | <b>.996</b>   | -.016         | -.311         | -.263         | -.776         | .065          | -.026         | -.243         | .356          | <b>.877</b>   |
| BkF     | -.066         | <b>.995</b>   | -.021         | .208          | <b>.807</b>   | .195          | -.317         | .027          | -.243         | <b>.905</b>   | .319          |
| BaP     | .368          | -.105         | <b>.716</b>   | <b>.963</b>   | .007          | -.051         | .203          | .000          | -.237         | <b>.932</b>   | .225          |
| DahA    | -.172         | <b>.774</b>   | .526          | -.167         | -.351         | -.750         | .098          | .399          | -.142         | <b>.793</b>   | .113          |
| IndP    | -.182         | .294          | <b>.926</b>   | -.157         | -.457         | <b>.776</b>   | .251          | -.169         | -.283         | .393          | <b>.783</b>   |
| BghiP   | -.053         | .018          | <b>.797</b>   | .123          | <b>.828</b>   | .402          | -.308         | .083          | -.154         | <b>.946</b>   | .121          |
| % Var   | <b>55.488</b> | <b>23.094</b> | <b>14.362</b> | <b>23.461</b> | <b>23.303</b> | <b>19.223</b> | <b>13.258</b> | <b>13.025</b> | <b>37.728</b> | <b>31.024</b> | <b>20.236</b> |
| Cum (%) | <b>55.488</b> | <b>78.582</b> | <b>92.945</b> | <b>23.461</b> | <b>46.764</b> | <b>65.987</b> | <b>79.246</b> | <b>92.271</b> | <b>37.728</b> | <b>68.751</b> | <b>88.987</b> |

**Table S13:** PCA of PAHs in outdoor dust from rural communities around gas flaring points

|         | Emu-Ebendo    |               |               | Otu-Jeremi    |               |               |               |               | Ebedei        |               |               |               |
|---------|---------------|---------------|---------------|---------------|---------------|---------------|---------------|---------------|---------------|---------------|---------------|---------------|
|         | Component     |               |               | Component     |               |               |               |               | Component     |               |               |               |
|         | 1             | 2             | 3             | 1             | 2             | 3             | 4             | 5             | 1             | 2             | 3             | 4             |
| Nap     | <b>.993</b>   | .074          | -.073         | <b>.687</b>   | -.050         | -.116         | .570          | .049          | -.198         | <b>.894</b>   | .122          | -.023         |
| Ace     | <b>.993</b>   | .073          | -.072         | .012          | <b>.881</b>   | -.295         | -.019         | .134          | -.213         | <b>.890</b>   | .131          | -.055         |
| Acy     | <b>.993</b>   | .074          | -.072         | <b>.936</b>   | .200          | -.132         | .009          | .156          | -.238         | .488          | <b>.779</b>   | -.121         |
| Flu     | <b>.993</b>   | .073          | -.072         | <b>.997</b>   | .029          | -.045         | .001          | -.006         | -.097         | .343          | <b>.902</b>   | -.241         |
| Phen    | <b>.994</b>   | .068          | -.053         | <b>.995</b>   | .053          | -.024         | .023          | .016          | -.081         | .293          | <b>.920</b>   | -.244         |
| Ant     | <b>.996</b>   | .057          | -.020         | <b>.996</b>   | .021          | -.013         | .025          | .024          | .046          | <b>.830</b>   | .392          | -.328         |
| Flt     | <b>.993</b>   | .076          | -.072         | <b>.853</b>   | .488          | -.131         | -.002         | -.014         | .100          | <b>.861</b>   | .272          | -.232         |
| Pyr     | <b>.993</b>   | .074          | -.072         | <b>.997</b>   | .006          | -.005         | .018          | .018          | .176          | -.056         | <b>.973</b>   | .048          |
| BaA     | .105          | <b>.913</b>   | .170          | <b>.989</b>   | -.034         | .107          | -.021         | -.036         | .575          | <b>.707</b>   | .023          | .225          |
| Chry    | <b>.979</b>   | .186          | -.045         | .518          | <b>.743</b>   | -.090         | -.079         | .171          | <b>.943</b>   | -.052         | -.067         | .149          |
| BbF     | <b>.976</b>   | .208          | -.014         | -.082         | -.094         | <b>.934</b>   | -.135         | -.058         | <b>.900</b>   | -.173         | .130          | .065          |
| BkF     | <b>.836</b>   | -.106         | -.248         | -.117         | -.055         | .044          | -.129         | <b>.943</b>   | .446          | -.030         | -.051         | <b>.879</b>   |
| BaP     | <b>.988</b>   | -.022         | -.083         | -.106         | <b>.794</b>   | .270          | -.053         | -.159         | -.057         | -.393         | -.397         | <b>.752</b>   |
| DahA    | -.056         | .080          | <b>.960</b>   | -.204         | -.292         | -.591         | -.708         | .062          | <b>.826</b>   | .048          | -.096         | .513          |
| IndP    | -.601         | -.575         | .390          | -.194         | -.274         | -.257         | <b>.863</b>   | -.207         | <b>.975</b>   | -.007         | -.097         | .181          |
| BghiP   | -.759         | <b>.587</b>   | -.120         | -.333         | -.240         | .453          | .040          | -.677         | .395          | -.094         | -.128         | <b>.858</b>   |
| % Var   | <b>77.710</b> | <b>10.282</b> | <b>7.645</b>  | <b>46.940</b> | <b>15.473</b> | <b>10.783</b> | <b>10.112</b> | <b>9.367</b>  | <b>26.374</b> | <b>26.035</b> | <b>23.069</b> | <b>17.178</b> |
| Cum (%) | <b>77.710</b> | <b>87.992</b> | <b>95.637</b> | <b>46.940</b> | <b>62.413</b> | <b>73.196</b> | <b>83.308</b> | <b>92.675</b> | <b>26.374</b> | <b>52.409</b> | <b>75.478</b> | <b>92.655</b> |

## REFERENCES

- Durant, J., Busby, W., Lafleur, A., Penman, B., Crespi, C. (1996). Human cell mutagenicity of oxygenated, nitrated and unsubstituted polycyclic aromatic hydrocarbons associated with urban aerosols. *Mutagen Research-Genetic Toxicology* 371:123-157.
- Iwegbue CMA, Obi G, Uzoekwe SA, Egobueze FE, Odali EW, Tesi GO, Nwajei GO, Martincigh B.S. (2019). Distribution, sources and risk of exposure to polycyclic aromatic hydrocarbons in indoor dusts from electronic repair workshops in southern Nigeria. *Emerging Contaminants* 5:23-30.
- USDOE (United States Department of Energy) (2011). The risk assessment information system (RAIS). US Department of Energy, Oak Ridge Operations (ORO) Office: Oak Ridge, TN, USA.
- USEPA (United State Environmental Protection Agency) (1989). Risk assessment for Superfund, Vol. I: Human health evaluation manual. Office of Solid Waste and guidance Emergency Response EPA/540/1-89/002.
- USEPA (United State Environmental Protection Agency) (1993). Risk-based concentration Table.US Environmental Protection Agency, Region 111 (Third Quarter).
- USEPA (United State Environmental Protection Agency) (2010). Regional screening levels (RSL) summary tables. <http://www.epa.gov/risk/risk-based-screening-table-generic-tables> (accessed on 21 April, 2017).
- USEPA (United State Environmental Protection Agency) (2011). Exposure factor handbook 2011 edition EPA/600/R-090/052F. National Center for Environmental Assessment, Office of Research and Development, US Environmental Protection Agency, Washington DC. Available from <https://cfpub.epa.gov/ncea/risk/recordisplay.cfm?deid=236252>.
- USEPA (United State Environmental Protection Agency) (2012). Mid Atlantic risk assessment, Regional Screening Level (RSL). Summary Table. <http://www.epa.gov/region9/surperfund/prg/>.
- USEPA (United State Environmental Protection Agency). (2001). Risk assessment guidance for Superfund (RAGS), Vol. III-part a, process for conducting probabilistic risk assessment, EPA 540-R-02-002. Office of Emergency and Remedial Response, Washington, DC.
- USEPA (United State Environmental Protection Agency). (2014). Human health evaluation manual, supplemental guidance: Update of standard default exposure factors. OSWER Directive 9200.1-120. Available from [https://www.epa.gov/sites/production/files/2015-11/documents/oswer\\_directive\\_9200.1-120\\_exposurefactors\\_corrected2.pdf](https://www.epa.gov/sites/production/files/2015-11/documents/oswer_directive_9200.1-120_exposurefactors_corrected2.pdf)
- Verbruggen, E.M.J. (2012). Environmental risk limits for polycyclic aromatic hydrocarbons (PAHs) for direct aquatic, benthic and terrestrial toxicity. RIVM Report. National Institute for Public Health and the Environment. Ministry of Health, Welfare and Sport.
- WHO (2018). Nigeria: Life Expectancy. Retrieved on December 10<sup>th</sup>, 2018 from <https://www.worldlifeexpectancy.com/nigeria-life-expectancy>
